# Supplementary material for: Synthesis and spectroscopic properties of β-meso directly linked porphyrin–corrole hybrid compounds
Source: publisher site journal article supplement (doi:10.3762/bjoc.14.13), 2018-01-22
Supplement: Additional file 1 [file 1860-5397-14-13-S1.pdf]

# Supporting Information

for

## Synthesis and spectroscopic properties of $\beta$ -*meso* directly linked porphyrin–corrole hybrid compounds

Baris Temelli\* and Hilal Kalkan

Address: Hacettepe University, Department of Chemistry, Beytepe Campus, 06800, Ankara, Turkey

Email: Baris Temelli - [temelli@hacettepe.edu.tr](mailto:temelli@hacettepe.edu.tr)

\* Corresponding author

### General experimental information, experimental details

on the synthesis of products 4 and 5a, and

full characterization data of all products

### Experimental section

**General methods.** All reactions were performed under N<sub>2</sub> atmosphere. All reagents and solvents were of reagent grade. The NMR spectra were recorded in CDCl<sub>3</sub> on a 400 MHz instrument with TMS as the internal standard. NMR data are represented as follows: chemical shift (ppm), multiplicity (s = singlet, brs = broad singlet, d = doublet, t = triplet, q = quartet, m = multiplet), coupling constants in hertz (Hz). IR spectra were recorded on FTIR spectrometer. HRMS were measured in ESI mode and the mass analyzer of the HRMS was TOF. Flash column chromatography was performed on silica gel (230–400 mesh).  $\beta$ -Formylated 5,10,15,20-

tetraphenylporphyrins **1** [1] and *meso*-substituted dipyrromethanes [2] were prepared according to literature methods and their spectral data matched literature values.

**General procedure for preparing hybrid compounds.** To a solution of compound **1** (0.100 mmol) and **2** (0.600 mmol, 6.0 equiv) in CHCl<sub>3</sub> (5 mL) under N<sub>2</sub> atmosphere was added InCl<sub>3</sub> (0.010 mmol, 10mol %) (0.100 mmol, 100 mol % AlCl<sub>3</sub> for **4d**) and the mixture was stirred at 60 °C for 24 h. The reaction mixture cooled to room temperature and *p*-chloranil (0.150 mmol, 1.5 equiv) was added. After 12 h. the reaction mixture was quenched with H<sub>2</sub>O (5 mL) and aqueous phase was extracted with CHCl<sub>3</sub>. Solvent was removed under reduced pressure and crude product was purified by flash column chromatography over silica gel with EtOAc:*n*-hexane (1:10).

Compound **4a**. 20 mg, 19% yield, purple solid. mp > 300 °C; R<sub>f</sub>: 0.44 (1:10 EtOAc/*n*-hexane); FTIR (ATR): 669, 701, 726, 752, 801, 880, 965, 979, 1002, 1074, 1126, 1176, 1263, 1374, 1464, 1542, 1559, 1598, 1634, 1654, 1683, 1699, 1716, 2851, 2924, 2955 cm<sup>-1</sup>; <sup>1</sup>H NMR (400 MHz, CDCl<sub>3</sub>): δ -2,46 (brs, 2H, N-H), 4.05 (t, *J*= 7.3 Hz, 1H, *p*-20<sup>4</sup>, Ar-H), 4.64 (t, *J*= 7.4 Hz, 2H, *m*-20<sup>3,5</sup>, Ar-H), 6.62 (d, *J*= 7.2 Hz, 2H, *o*-20<sup>2,6</sup>, Ar-H), 7.60-7.80 (m, 18H, Ar-H), 8.00 (d, *J*= 5.0 Hz, 1H, porphyrin β-H), 8.08-8.12 (m, 2H, Ar-H), 8.20-8.27 (m, 5H, 3 Ar-H, 2 corrole β-H), 8.42 (d, *J*= 7.0 Hz, 2H, Ar-H), 8.50 (d, *J*= 5.0 Hz, 1H, porphyrin β-H), 8.59 (d, *J*= 5.0 Hz, 2H, corrole β-H), 8.62 (d, *J*= 4.8 Hz, 2H, corrole β-H), 8.75-8.79 (m, 1H, porphyrin β-H), 8.80-8.84 (m, 1H, porphyrin β-H), 8.86-8.89 (m, 1H, porphyrin β-H), 8.90-8.93 (m, 1H, porphyrin β-H), 8.96 (d, *J*= 4.3 Hz, 2H, corrole β-H), 9.63 (s, 1H, porphyrin β-H); <sup>13</sup>C NMR (100 MHz, CDCl<sub>3</sub>) δ 120.6, 126.9, 127.4, 128.0, 128.2, 129.0, 134.5, 134.6, 134.7, 135.0, 141.6, 141.8, 142.0, 142.5; HRMS (ESI) *m/z* calcd for C<sub>75</sub>H<sub>51</sub>N<sub>8</sub> (M+H)<sup>+</sup> 1063.4231, found 1063.4212.

Compound **4b**. 24 mg, 22% yield, purple solid. mp > 300 °C; R<sub>f</sub>: 0.46 (1:10 EtOAc/*n*-hexane); FTIR (ATR): 665, 701, 728, 750, 806, 880, 974, 962, 998, 1071, 1130, 1181, 1265, 1374, 1460, 1537, 1552, 1601, 1639, 1651, 1683, 1700, 2863, 2920, 2968 cm<sup>-1</sup>; <sup>1</sup>H NMR (400 MHz, CDCl<sub>3</sub>): δ -2,90 (brs, 2H, N-H), -2.45 (brs, 1H, NH), 2.62 (s, 3H, CH<sub>3</sub>), 2.65 (s, 3H, CH<sub>3</sub>), 3.90-3.96 (m, 1H, *p*-20<sup>4</sup>, Ar-H), 4.60-4.67 (m, 2H, *m*-20<sup>3,5</sup>, Ar-H), 6.80 (d, *J*= 6.9 Hz, 2H, *o*-20<sup>2,6</sup>, Ar-H), 7.42-7.50 (m, 6H), 7.60-7.75 (m, 7H), 7.95-8.03 (m, 4H), 8.10-8.15 (m, 4H), 8.20-8.25 (m, 2H), 8.35-8.40 (m, 2H), 8.51-8.57 (m, 4H), 8.75-8.83 (m, 6H), 8.87-8.93 (m, 2H), 9.61 (s, 1H, porphyrin

$\beta$ -H);  $^{13}\text{C}$  NMR (100 MHz,  $\text{CDCl}_3$ )  $\delta$  29.0, 29.4, 118.9, 119.1, 120.3, 120.8, 122.3, 123.5, 124.0, 124.4, 124.5, 126.7, 126.8, 126.9, 127.4, 127.8, 128.9, 131.0, 132.0, 132.4, 137.2, 138.5, 138.9, 139.4, 139.5, 142.0, 142.2, 142.5, 145.5, 147.1, 147.7, 149.2; HRMS (ESI)  $m/z$  calcd for  $\text{C}_{77}\text{H}_{55}\text{N}_8$  ( $\text{M}+\text{H}$ ) $^+$  1091.4544, found 1091.4560.

Compound **4c**. 18 mg, 16% yield, purple solid. mp > 300 °C;  $R_f$ : 0.89 ( $\text{CHCl}_3$ ); FTIR (ATR): 669, 701, 726, 751, 799, 846, 865, 884, 964, 980, 1002, 1073, 1107, 1178, 1223, 1267, 1336, 1375, 1464, 1516, 1540, 1558, 1592, 1717, 2852, 2925, 2955  $\text{cm}^{-1}$ ;  $^1\text{H}$  NMR (400 MHz,  $\text{CDCl}_3$ ):  $\delta$  -2.40 (brs, 2H, N-H), 4.07-4.14 (brs, 1H,  $p$ -20 $^4$ , Ar-H), 4.68 (t,  $J$ = 7.2 Hz, 2H,  $m$ -20 $^{3,5}$ , Ar-H), 6.69 (d,  $J$ = 7.8 Hz, 2H,  $o$ -20 $^{2,6}$ , Ar-H), 7.50-7.56 (m, 1H, Ar-H), 7.67-7.86 (m, 12H, 10 Ar-H, 2 corrole  $\beta$ -H), 8.04-8.09 (m, 1H, porphyrin  $\beta$ -H), 8.14-8.20 (m, 2H, Ar-H), 8.27-8.33 (m, 2H, corrole  $\beta$ -H), 8.40-8.45 (m, 2H, Ar-H), 8.48-8.54 (m, 2H, Ar-H), 8.56-8.73 (m, 9H, 6 Ar-H, 2 corrole  $\beta$ -H, 1 porphyrin  $\beta$ -H), 8.82-8.86 (m, 1H, porphyrin  $\beta$ -H), 8.87-8.91 (m, 1H, porphyrin  $\beta$ -H), 8.98-9.03 (m, 2H, porphyrin  $\beta$ -H), 9.09-9.16 (m, 2H, corrole  $\beta$ -H), 9.71 (s, 1H, porphyrin  $\beta$ -H);  $^{13}\text{C}$  NMR (100 MHz,  $\text{CDCl}_3$ )  $\delta$  120.5, 120.8, 121.9, 123.4, 126.7, 126.8, 127.9, 128.9, 130.9, 131.0, 132.3, 133.9, 134.5, 134.7, 134.9, 135.4, 141.8, 142.1, 144.0, 147.0; HRMS (ESI)  $m/z$  calcd for  $\text{C}_{75}\text{H}_{48}\text{N}_{10}\text{O}_4$  ( $\text{M}-\text{H}$ ) $^-$  1151.3787, found 1151.3717.

Compound **4e**. 25 mg, 20% yield, purple solid. mp > 300 °C;  $R_f$ : 0.51 (1:1  $\text{CHCl}_3$ /n-hexane); FTIR (ATR): 668, 705, 753, 802, 929, 981, 1057, 1214, 1263, 1378, 1481, 1527, 1718, 2847, 2923, 2956  $\text{cm}^{-1}$ ;  $^1\text{H}$  NMR (400 MHz,  $\text{CDCl}_3$ ):  $\delta$  -2.43 (brs, 2H, N-H), 3.93 (t,  $J$ = 7.5 Hz, 1H,  $p$ -20 $^4$ , Ar-H), 4.56 (t,  $J$ = 7.2 Hz, 2H,  $m$ -20 $^{3,5}$ , Ar-H), 6.61 (d,  $J$ = 7.8 Hz, 2H,  $o$ -20 $^{2,6}$ , Ar-H), 7.68-7.83 (m, 11H, 9 Ar-H, 2 corrole  $\beta$ -H), 8.11 (d,  $J$ = 4.6 Hz, 1H, porphyrin  $\beta$ -H), 8.17 (d,  $J$ = 7.1 Hz, 2H, Ar-H), 8.29-8.32 (m, 2H, corrole-H), 8.48-8.52 (m, 4H, Ar-H), 8.62 (brs, 2H, corrole  $\beta$ -H), 8.67 (d,  $J$ = 4.7 Hz, 1H, porphyrin  $\beta$ -H), 8.96 (d,  $J$ = 4.7 Hz, 1H, porphyrin  $\beta$ -H), 9.00 (d,  $J$ = 4.8 Hz, 1H, porphyrin  $\beta$ -H), 9.08 (d,  $J$ = 4.8 Hz, 1H, porphyrin  $\beta$ -H), 9.11 (d,  $J$ = 4.6 Hz, 1H, porphyrin  $\beta$ -H), 9.17 (d,  $J$ = 4.3 Hz, 2H, corrole  $\beta$ -H), 9.86 (s, 1H, porphyrin  $\beta$ -H);  $^{13}\text{C}$  NMR (100 MHz,  $\text{CDCl}_3$ )  $\delta$  120.1, 120.4, 120.7, 123.7, 125.2, 125.5, 126.1, 128.9, 129.1, 131.0, 134.0, 134.7, 134.8, 134.9, 135.0, 135.2, 139.1, 139.2, 139.3; HRMS (ESI)  $m/z$  calcd for  $\text{C}_{75}\text{H}_{41}\text{F}_{10}\text{N}_8$  ( $\text{M}+\text{H}$ ) $^+$  1243.3289, found 1243.3247.

Compound **4f**. 24 mg, 21% yield, purple solid. mp > 300 °C;  $R_f$ : 0.22 (1:10 EtOAc/n-hexane); FTIR (ATR): 701, 759, 802, 969, 999, 1075, 1130, 1278, 1339, 1375, 1457, 1697, 2853, 2926, 2962  $\text{cm}^{-1}$ ;  $^1\text{H}$  NMR (400 MHz,  $\text{CDCl}_3$ ):  $\delta$  -2.80 (brs, 2H, N-H), 4.00 (t,  $J$ = 7.5 Hz, 1H,  $p$ -20<sup>4</sup>- Ar-H), 4.71 (t,  $J$ = 7.6 Hz, 2H,  $m$ -20<sup>3,5</sup>, Ar-H), 6.88 (d,  $J$ = 7.6 Hz, 2H,  $o$ -20<sup>2,6</sup> Ar-H), 7.65-7.85 (m, 16H), 8.14-8.20 (m, 5H), 8.30 (d,  $J$ = 4.8 Hz, 1H, porphyrin  $\beta$ -H), 8.31-8.34 (m, 4H), 8.43-8.47 (m, 2H), 8.57-8.58 (m, 2H), 8.63 (d,  $J$ = 4.8 Hz, 2H), 8.71 (d,  $J$ = 4.6 Hz, 1H, porphyrin  $\beta$ -H), 8.86 (brs, 3H), 8.97 (d,  $J$ = 4.8 Hz, 1H, porphyrin  $\beta$ -H), 9.00 (d,  $J$ = 4.6 Hz, 1H, porphyrin  $\beta$ -H), 9.07 (d,  $J$ = 4.7 Hz, 1H, porphyrin  $\beta$ -H), 9.10 (d,  $J$ = 4.7 Hz, 1H, porphyrin  $\beta$ -H), 9.83 (s, 1H, porphyrin  $\beta$ -H);  $^{13}\text{C}$  NMR (100 MHz,  $\text{CDCl}_3$ )  $\delta$  120.9, 121.6, 126.7, 127.7, 127.9, 128.8, 133.0, 133.4, 134.4, 134.5, 134.6, 136.2, 141.6, 142.1, 142.3, 143.2, 146.2, 147.2, 150.1, 150.6, 151.3, 151.7, 151.8; HRMS (ESI)  $m/z$  calcd for  $\text{C}_{75}\text{H}_{49}\text{N}_8\text{Zn}$  ( $\text{M}+\text{H}$ )<sup>+</sup> 1125.3366, found 1125.3283.

Compound **4g**. 19 mg, 17% yield, purple solid. mp > 300 °C;  $R_f$ : 0.30 (1:10 EtOAc/n-hexane); FTIR (ATR): 701, 722, 741, 799, 966, 980, 996, 1004, 1038, 1071, 1122, 1178, 1275, 1345, 1381, 1466, 1724, 2854, 2923, 2955  $\text{cm}^{-1}$ ; HRMS (ESI)  $m/z$  calcd for  $\text{C}_{75}\text{H}_{48}\text{CuN}_8$  ( $\text{M}+\text{H}$ )<sup>+</sup> 1124.3371, found 1124.3335.

Compound **5a**. 4.6 mg, 4% yield, purple solid. mp > 300 °C;  $R_f$ : 0.14 (1:1  $\text{CH}_2\text{Cl}_2$ /n-hexane); FTIR (ATR): 667, 700, 749, 801, 964, 980, 1002, 1032, 1072, 1122, 1174, 1215, 1349, 1441, 1472, 1560, 1597, 1717, 2853, 2926, 3023  $\text{cm}^{-1}$ ;  $^1\text{H}$  NMR (400 MHz,  $\text{CDCl}_3$ ):  $\delta$  -2.83 (brs, 2H, N-H), -2.38 (brs, 2H, N-H), 4.04 (t,  $J$ = 6.8 Hz, 1H,  $p$ -20<sup>4</sup>, Ar-H), 4.73 (t,  $J$ = 7.6 Hz, 2H,  $m$ -20<sup>3,5</sup>, Ar-H), 6.88 (d,  $J$ = 6.9 Hz, 2H,  $o$ -20<sup>2,6</sup>, Ar-H), 7.62-7.83 (m, 18H, Ar-H), 8.14-8.23 (m, 6H, 5 Ar-H, 1  $\beta$ -H), 8.28-8.34 (m, 4H, Ar-H), 8.36-8.41 (m, 1H, Ar-H), 8.44-8.47 (m, 2H, Ar-H), 8.58 (d,  $J$ = 4.8 Hz, 2H,  $\beta$ -H), 8.61-8.66 (m, 2H,  $\beta$ -H), 8.83-8.92 (m, 5H,  $\beta$ -H), 8.90 (d,  $J$ = 4.5 Hz, 1H,  $\beta$ -H), 8.97 (d,  $J$ = 4.7 Hz, 1H,  $\beta$ -H), 9.00 (d,  $J$ = 4.7 Hz, 1H,  $\beta$ -H), 9.68 (s, 1H,  $\beta$ -H);  $^{13}\text{C}$  NMR (100 MHz,  $\text{CDCl}_3$ )  $\delta$  120.1, 120.3, 120.4, 120.7, 122.5, 122.6, 124.3, 126.8, 127.0, 127.1, 127.6, 127.9, 128.0, 128.2, 132.5, 134.7, 134.8, 135.0, 135.2, 139.3, 142.2, 142.5, 142.6, 142.7; HRMS (ESI)  $m/z$  calcd for  $\text{C}_{82}\text{H}_{55}\text{N}_8$  ( $\text{M}+\text{H}$ )<sup>+</sup> 1151.4544, found 1151.4518.



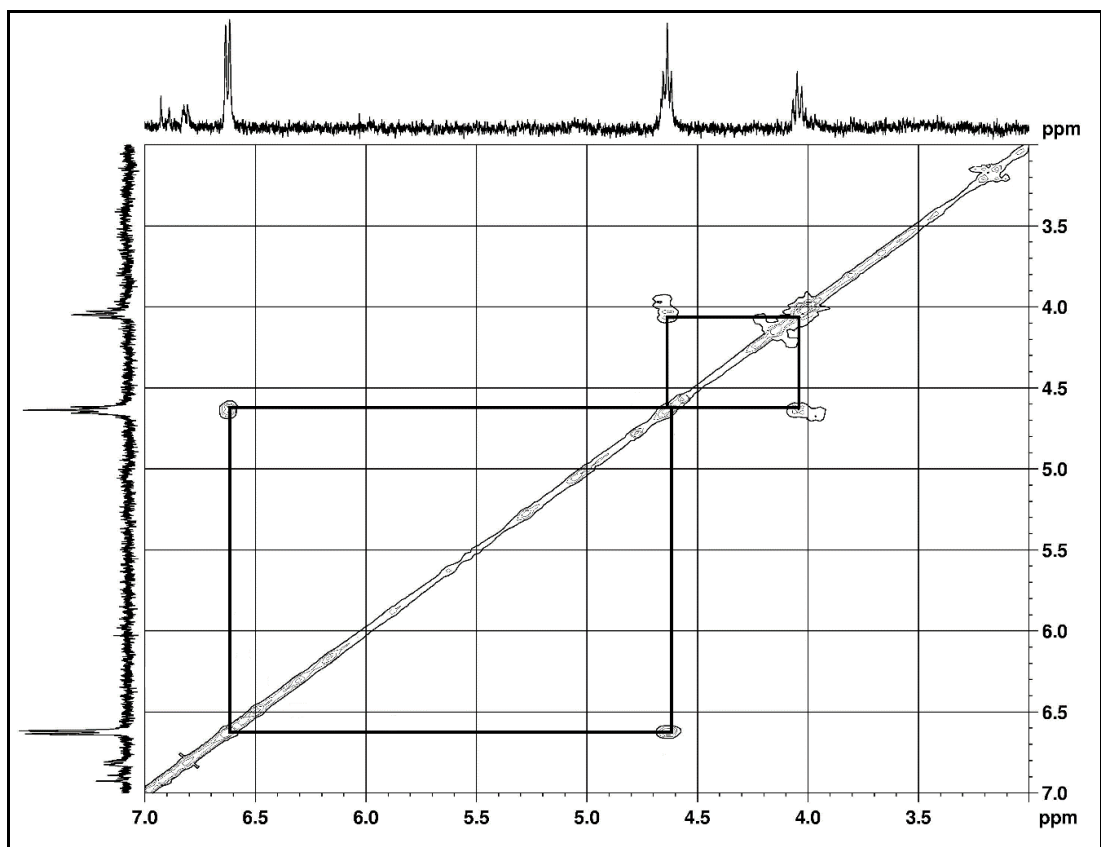

Figure S3.  $^1\text{H}$ - $^1\text{H}$  COSY NMR spectrum of **4a** (3.0–7.0 ppm, Solvent:  $\text{CDCl}_3$ )

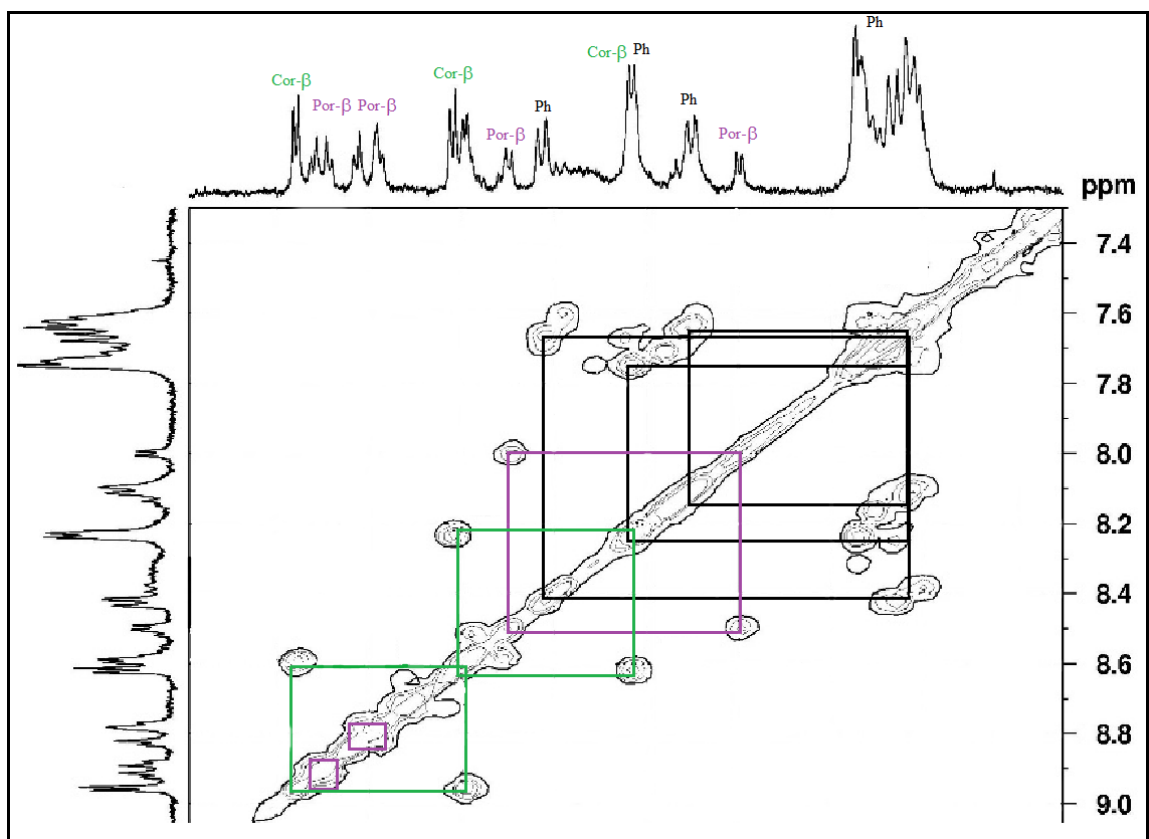

Figure S4.  $^1\text{H}$ - $^1\text{H}$  COSY NMR spectrum of **4a** (7.3–9.0 ppm, Solvent:  $\text{CDCl}_3$ )

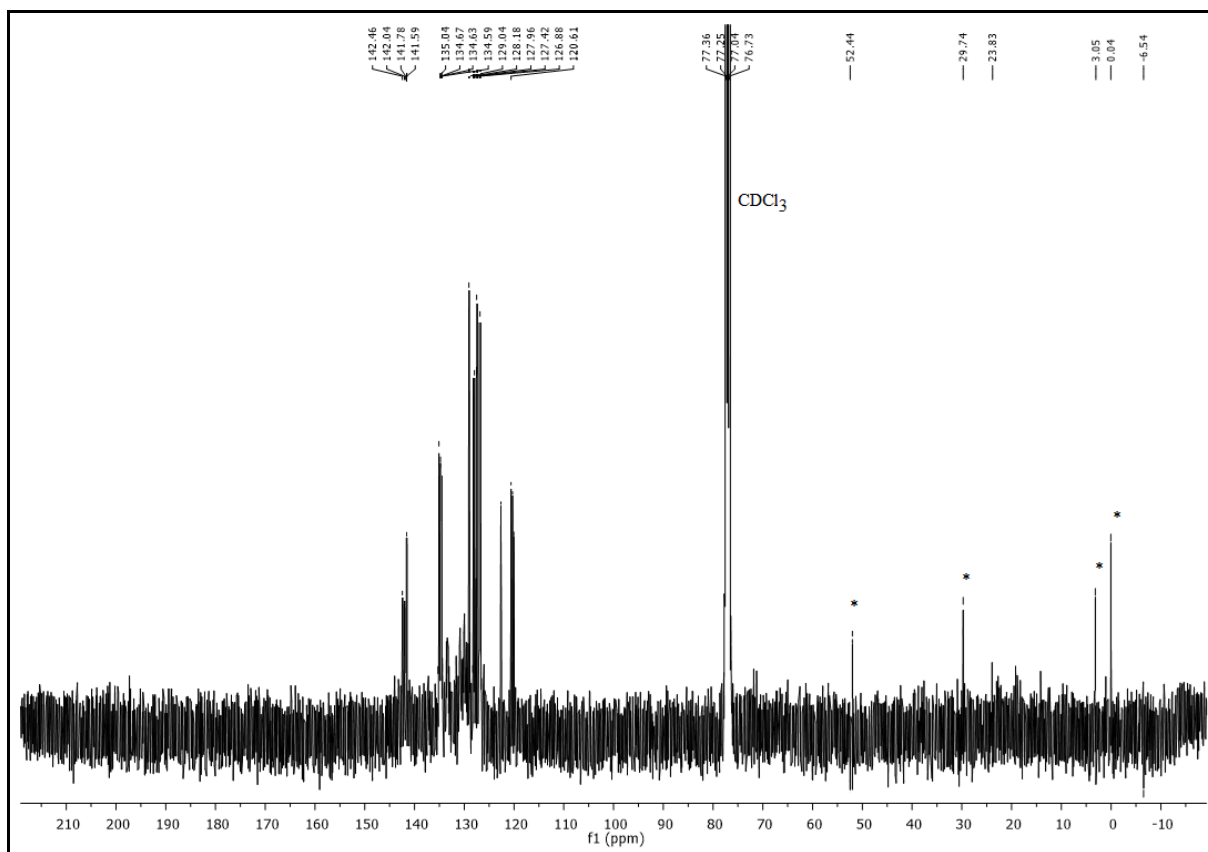

Figure S5. <sup>13</sup>C NMR spectrum of **4a** (Solvent: CDCl<sub>3</sub>) \* Solvent impurities

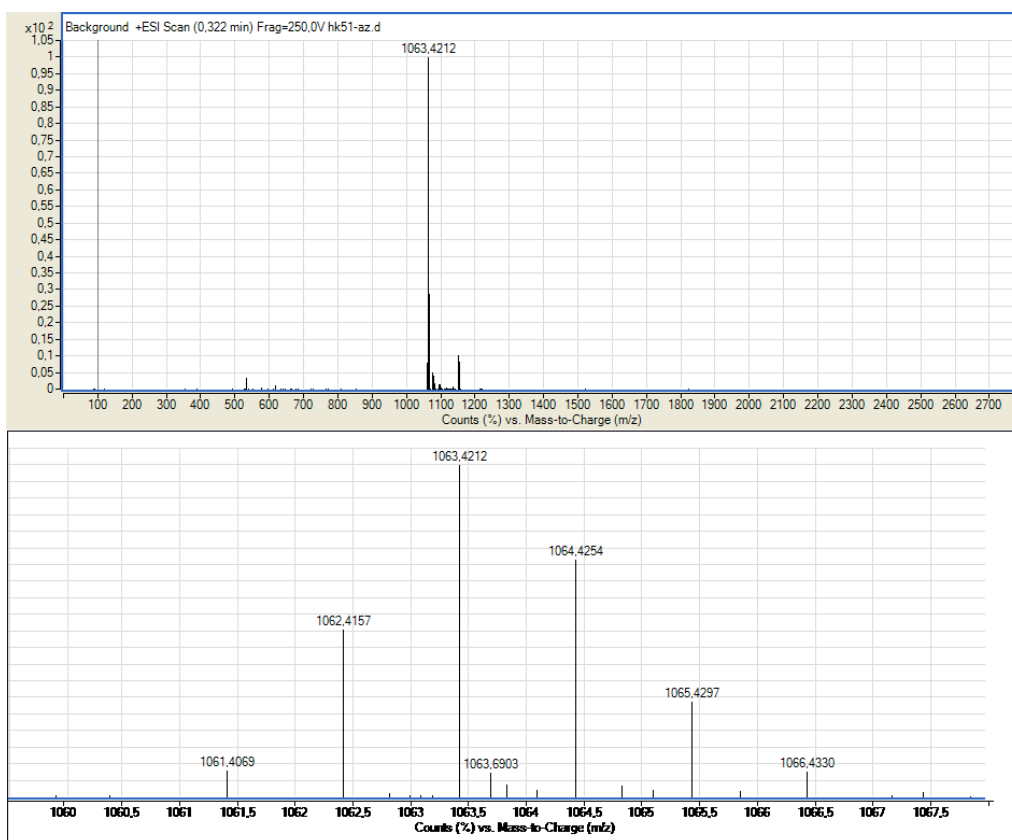

Figure S6. HRMS of **4a**.

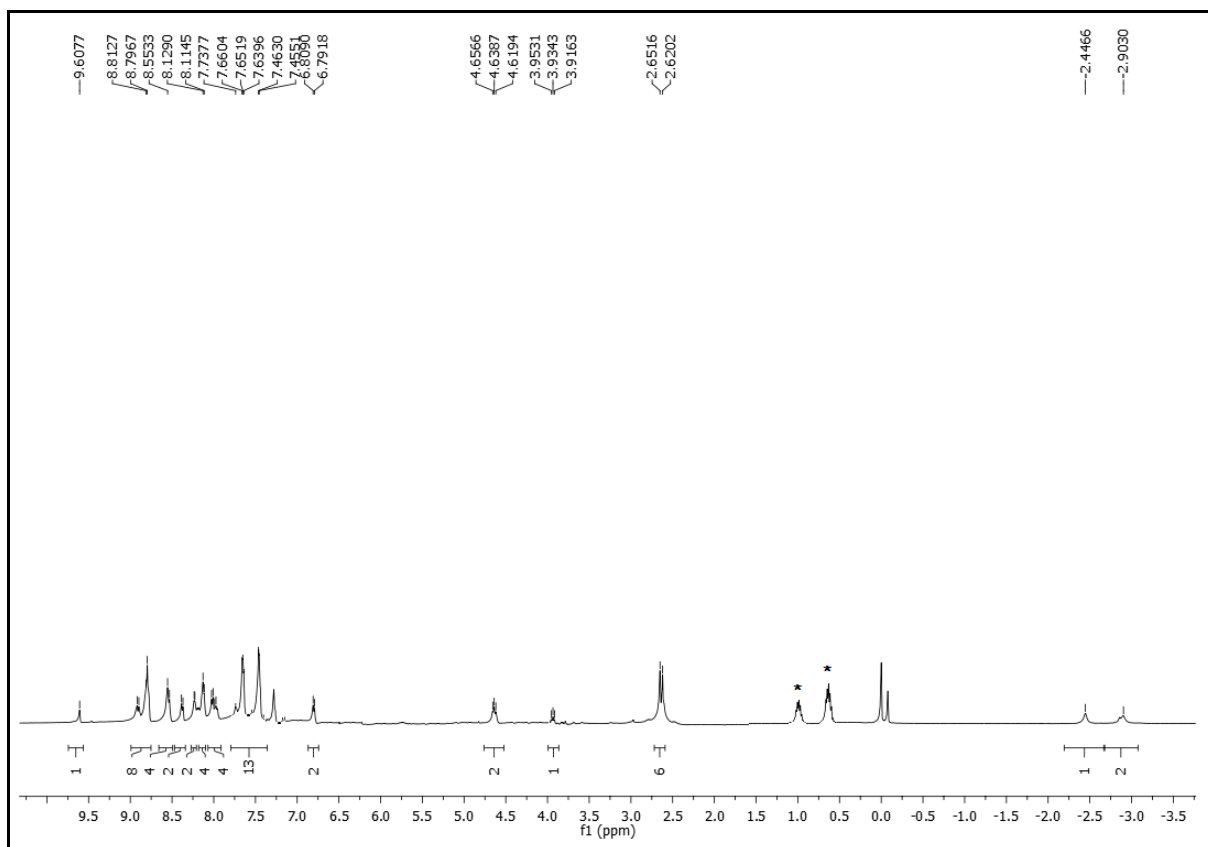

**Figure S7.**  $^1\text{H}$  NMR spectrum of **4b** (Solvent:  $\text{CDCl}_3$ ) \* Solvent impurities

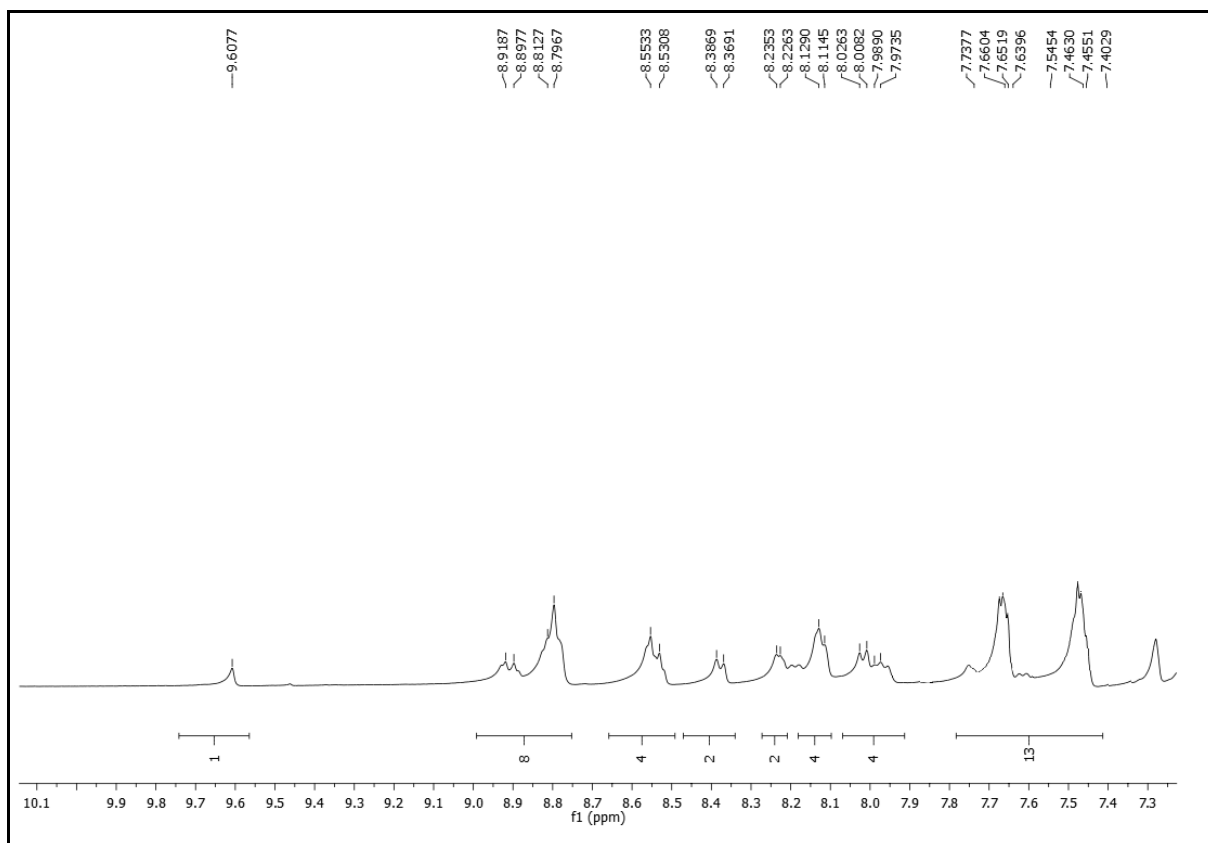

**Figure S8.**  $^1\text{H}$  NMR spectrum of **4b** (7.2–10.1 ppm, Solvent:  $\text{CDCl}_3$ )



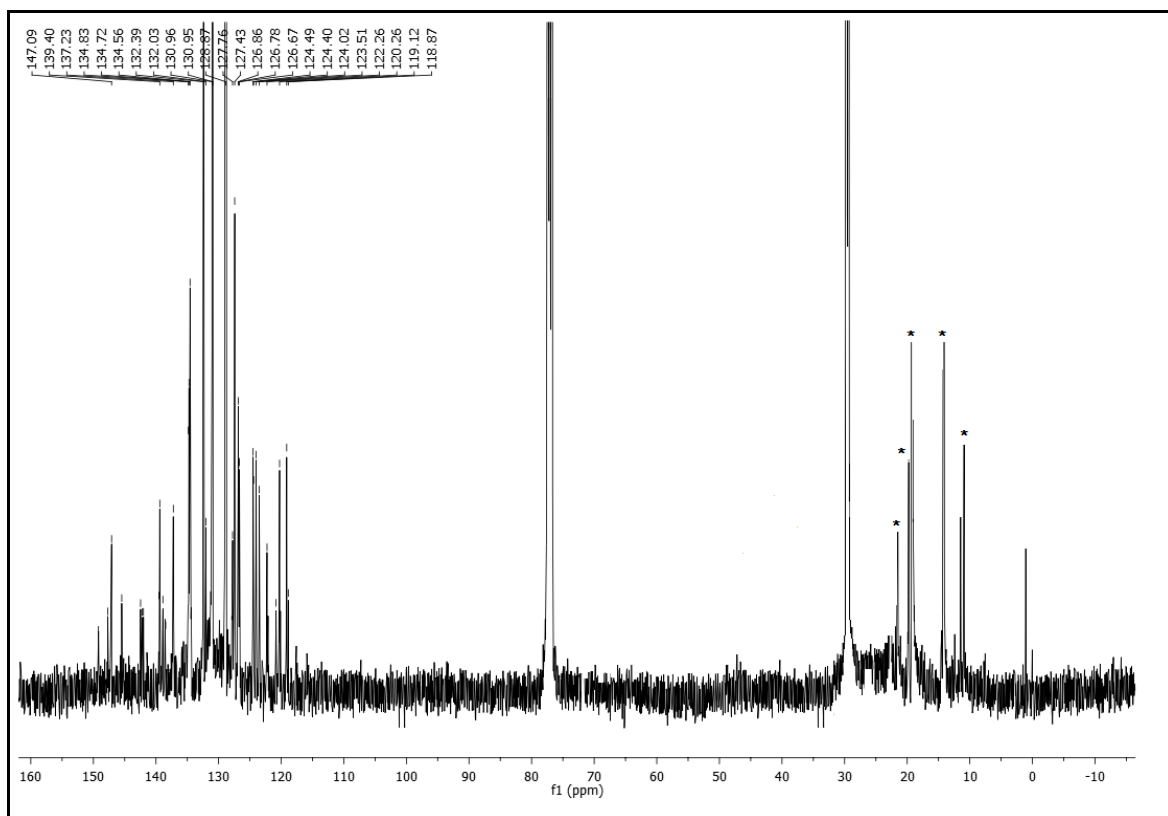

**Figure S9.**  $^{13}\text{C}$  NMR spectrum of **4b** (Solvent:  $\text{CDCl}_3$ ) \* Solvent impurities

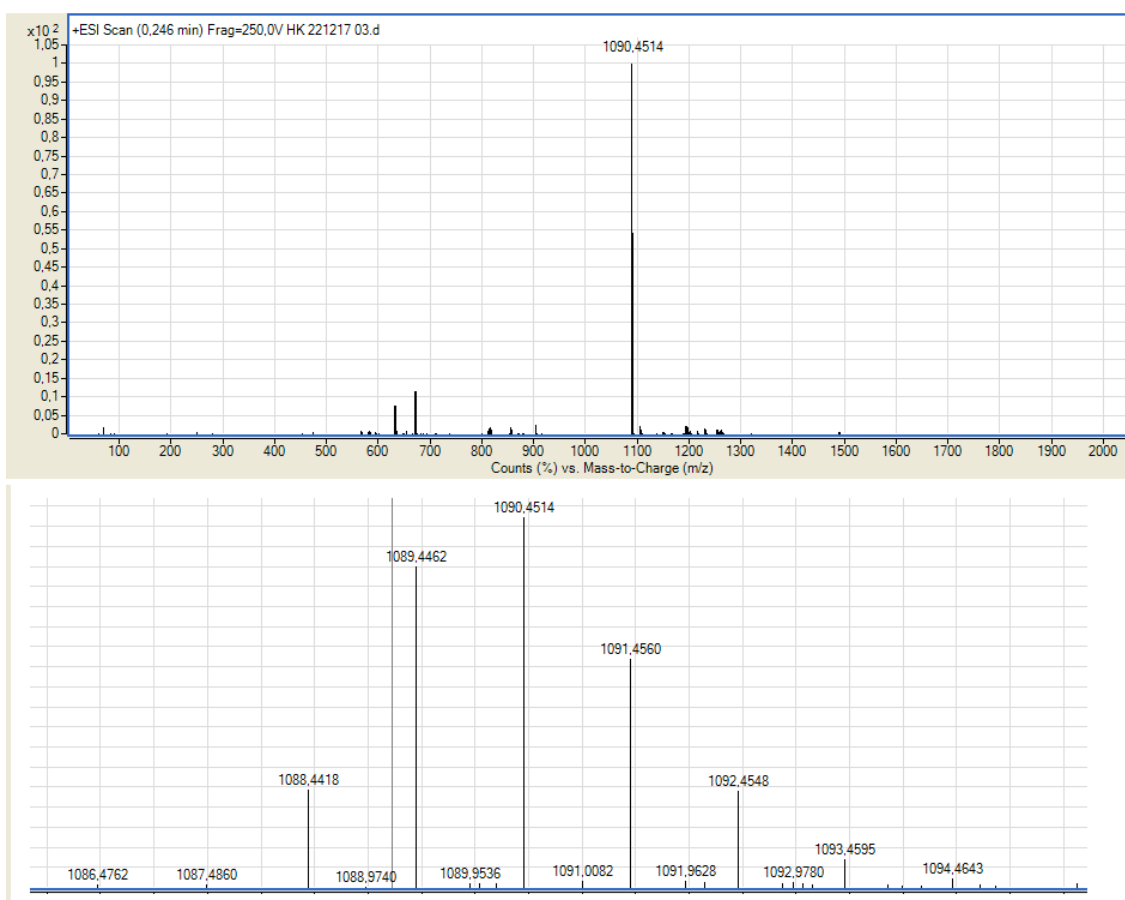

**Figure S10.** HRMS of **4b**.

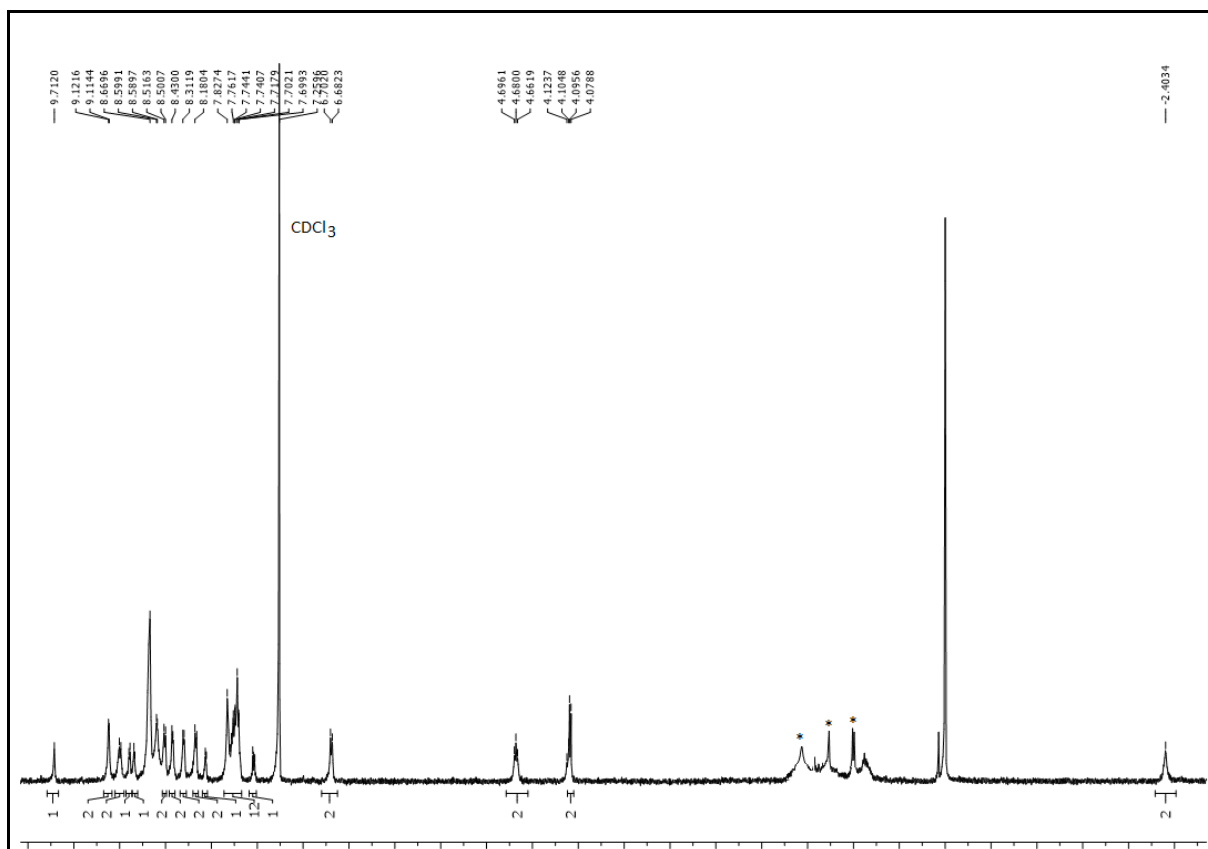

Figure S11. <sup>1</sup>H NMR spectrum of **4c** (Solvent: CDCl<sub>3</sub>) \* Solvent impurities

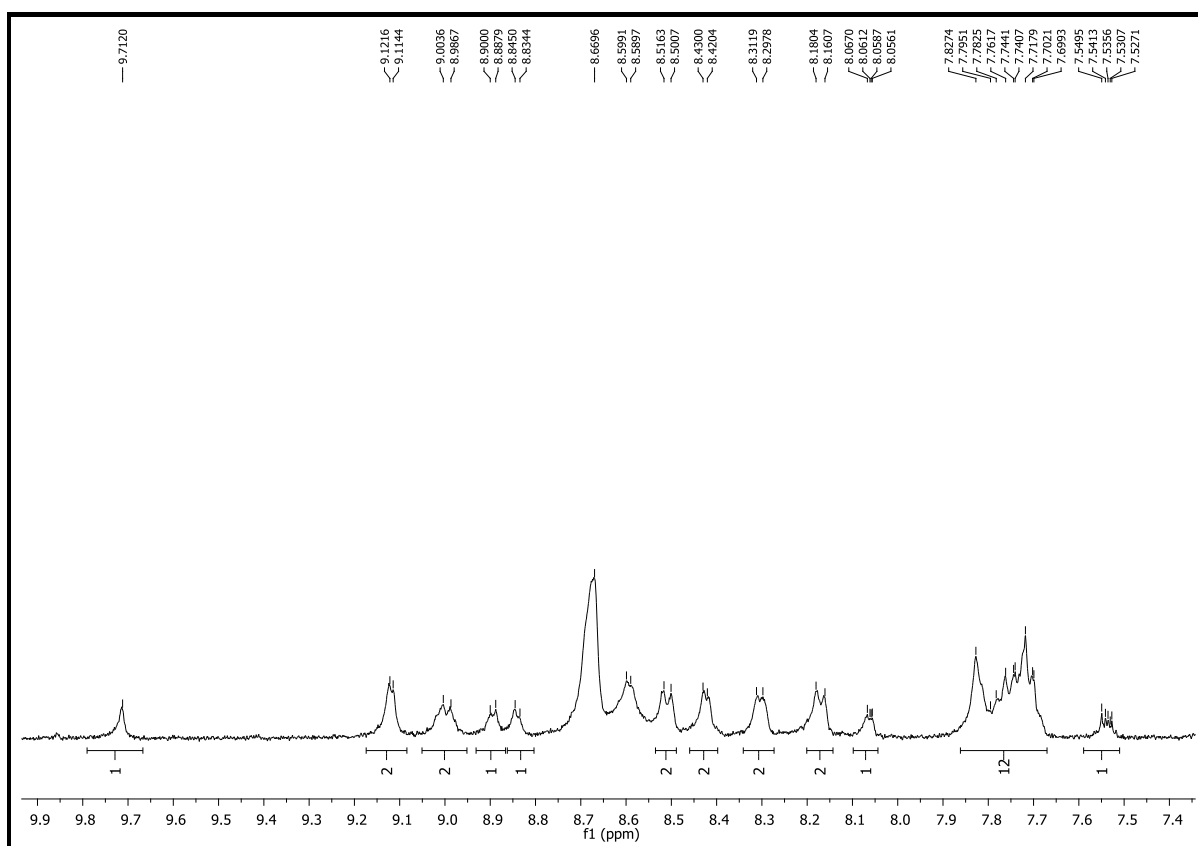

Figure S12. <sup>1</sup>H NMR spectrum of **4c** (7.3–9.9 ppm, Solvent: CDCl<sub>3</sub>)

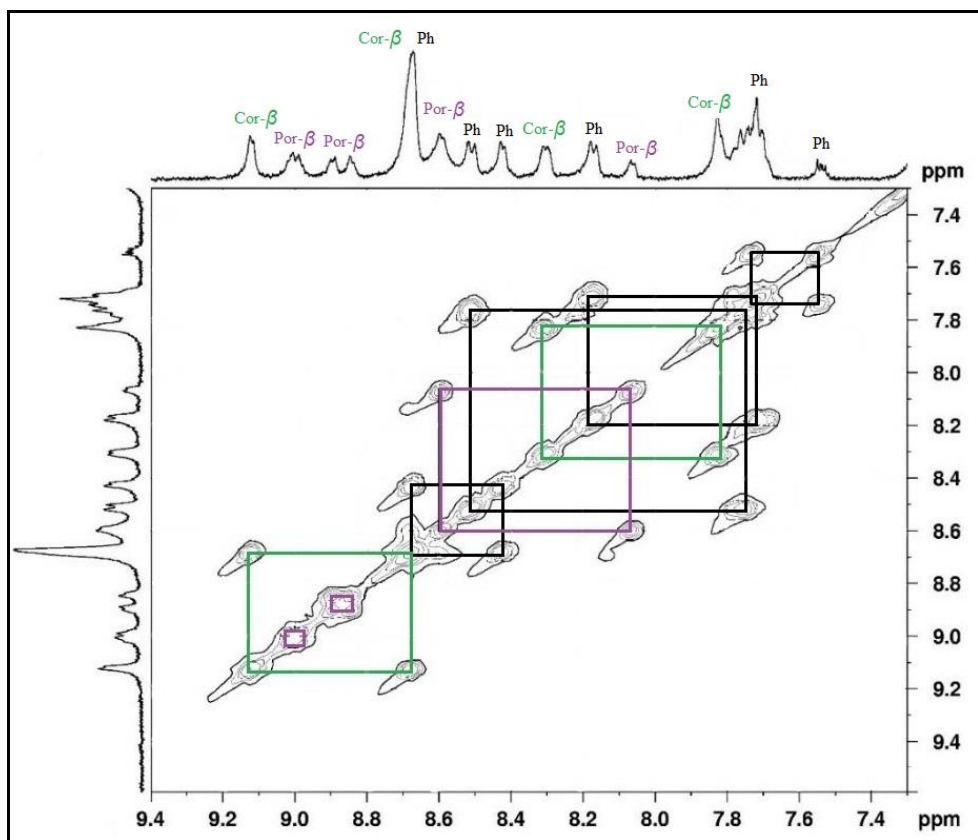

Figure S13.  $^1\text{H}$ - $^1\text{H}$  COSY NMR spectrum of **4c** (7.3–9.4 ppm, Solvent:  $\text{CDCl}_3$ )

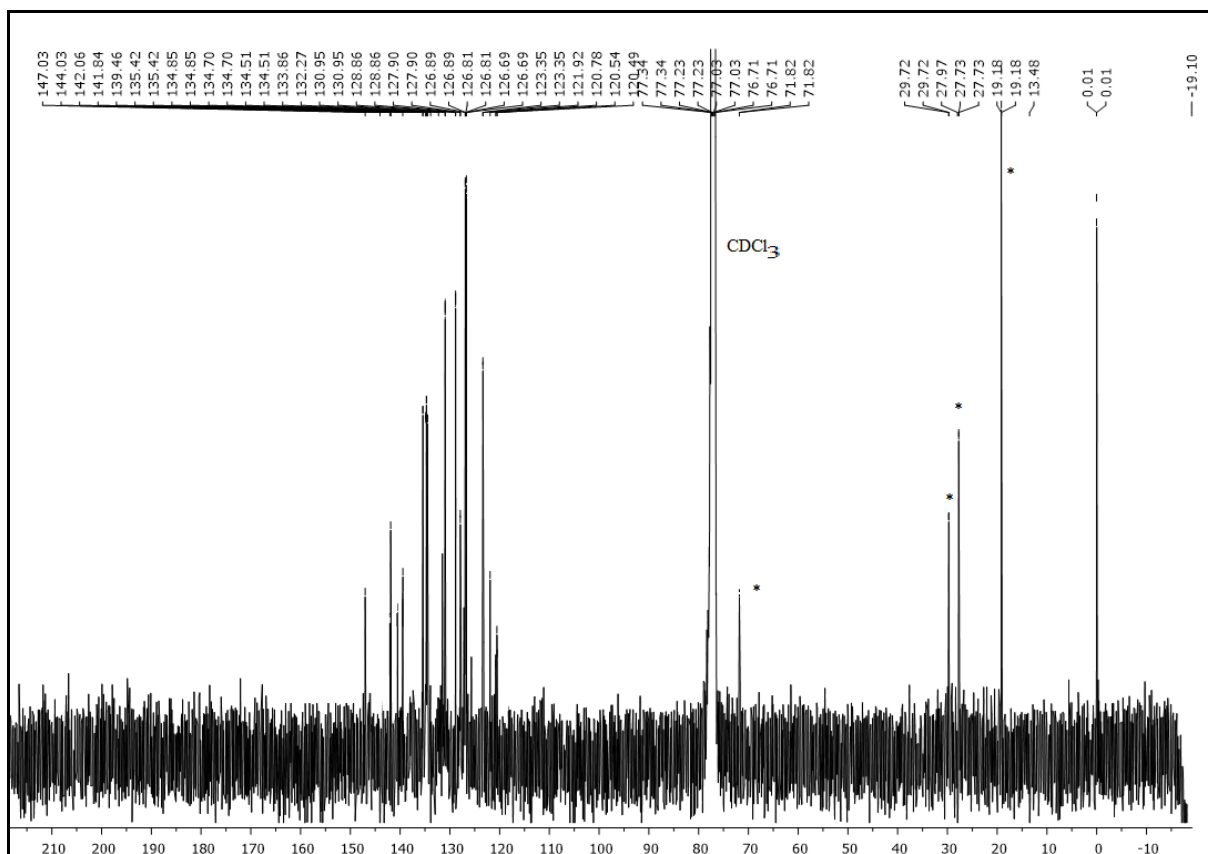

Figure S14.  $^{13}\text{C}$  NMR spectrum of **4c** (Solvent:  $\text{CDCl}_3$ ) \* Solvent impurities

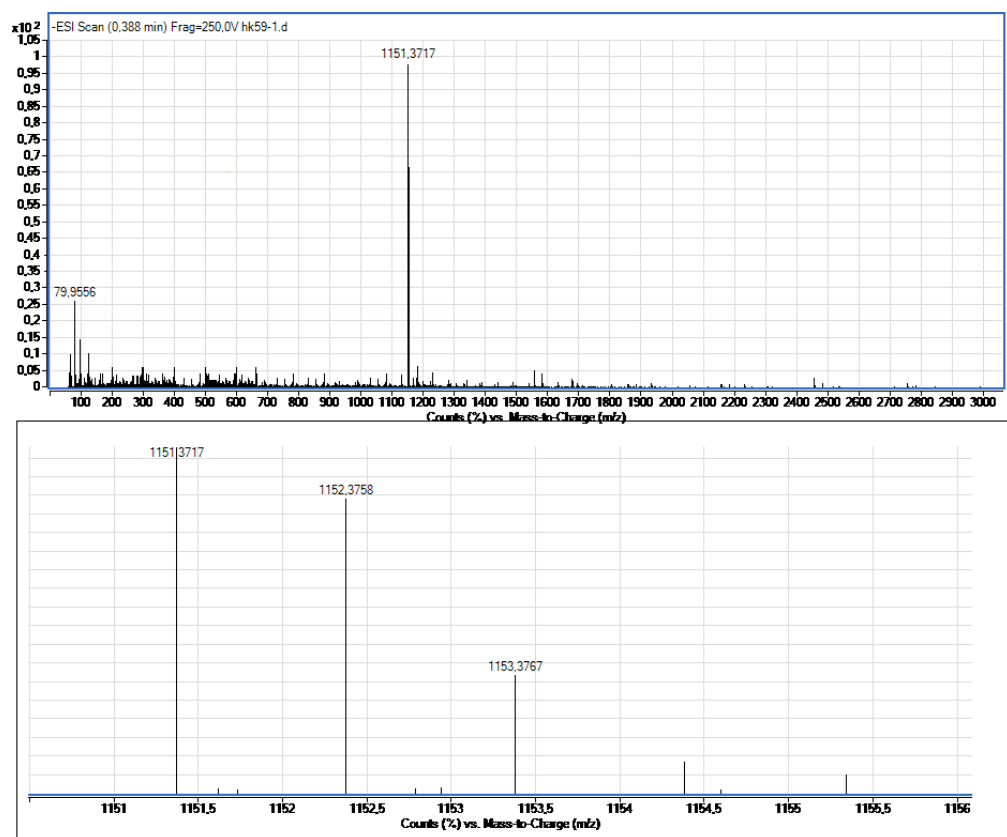

Figure S15. HRMS of 4c.

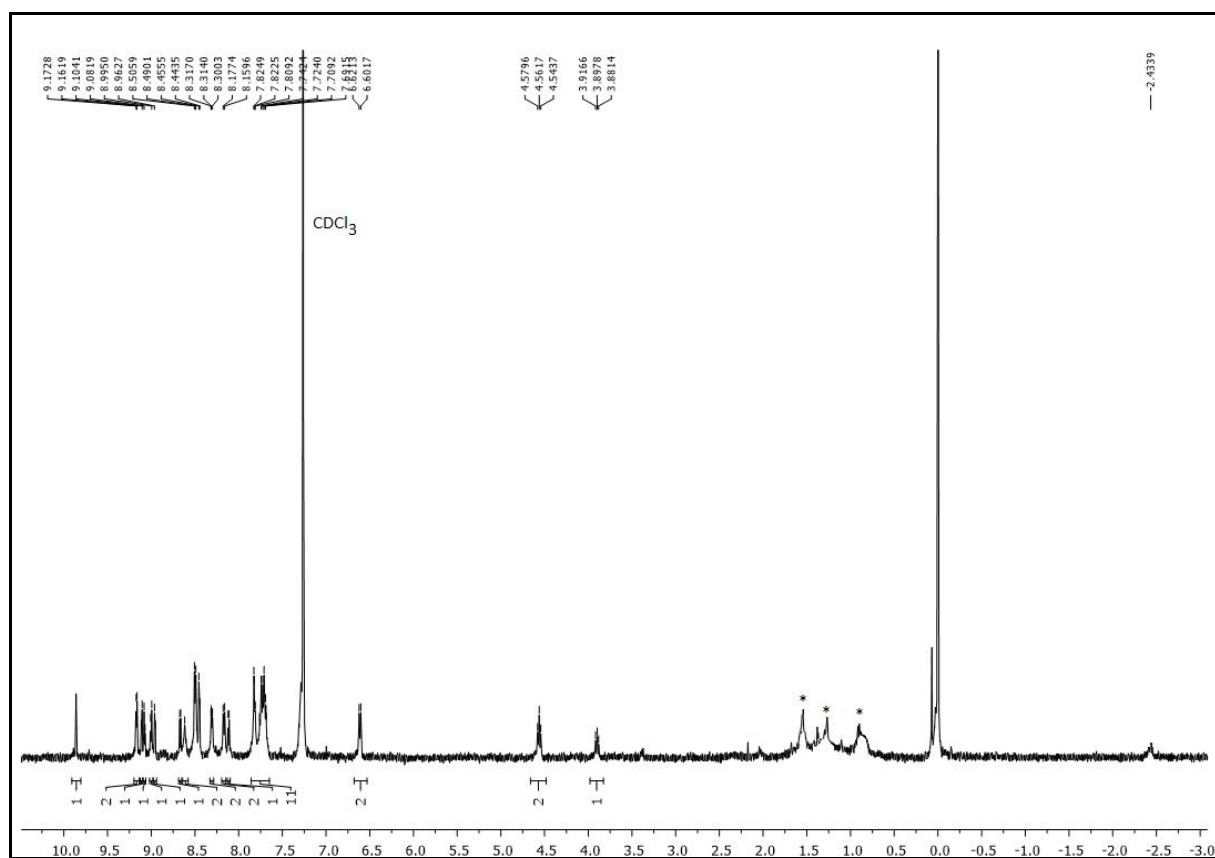

Figure S16.  $^1\text{H}$  NMR spectrum of 4e (Solvent:  $\text{CDCl}_3$ ) \* Solvent impurities

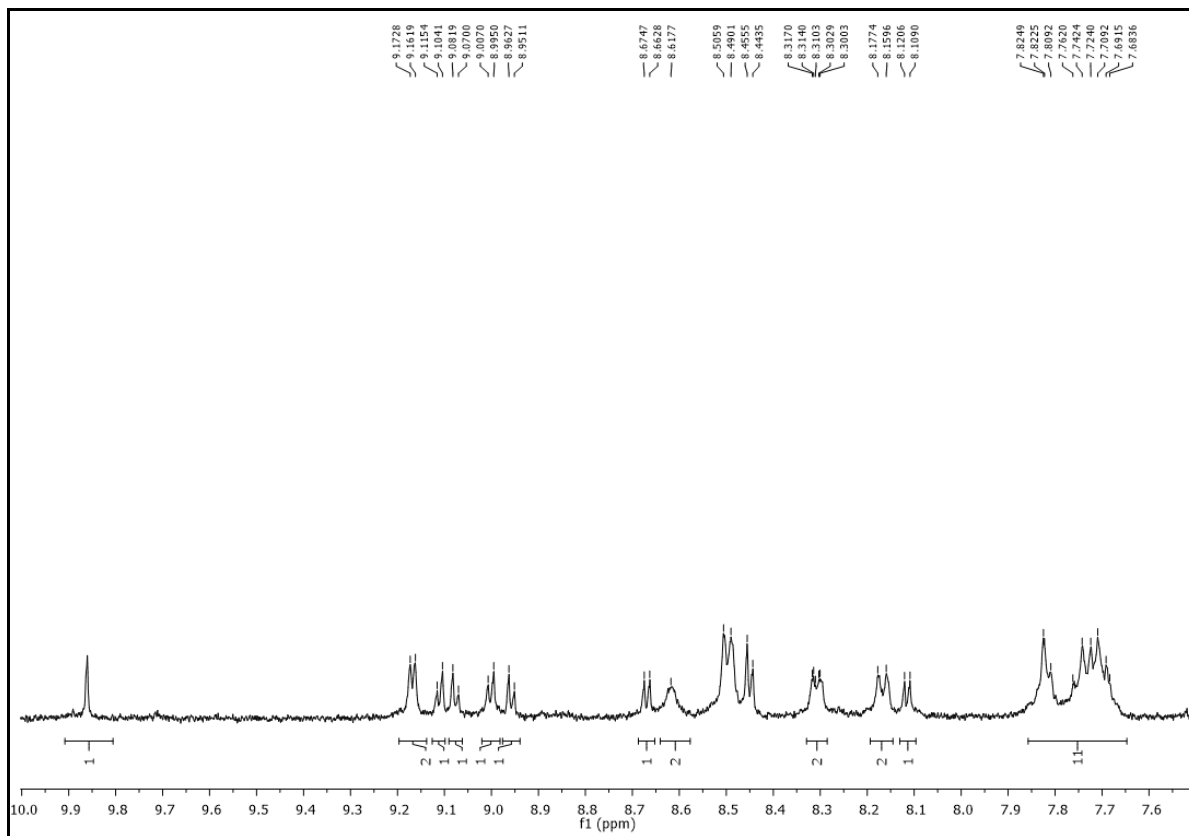

Figure S17.  $^1\text{H}$  NMR spectrum of **4e** (7.5–10.0 ppm, Solvent:  $\text{CDCl}_3$ )

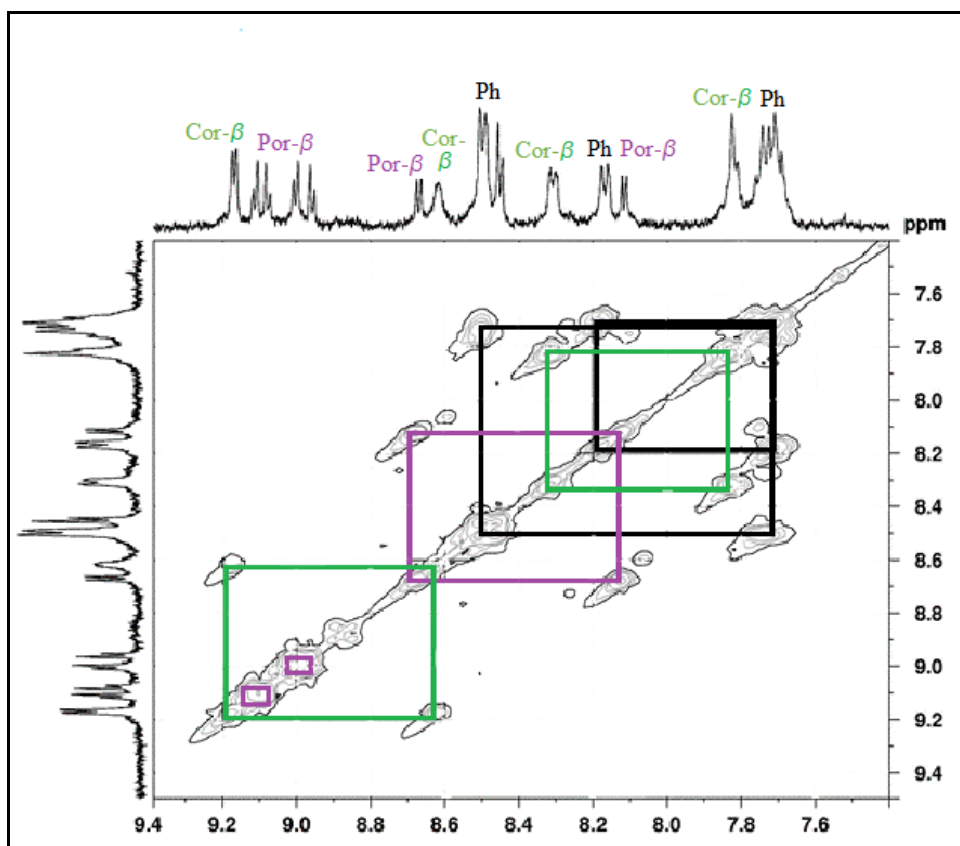

Figure S18.  $^1\text{H}$ - $^1\text{H}$  COSY NMR spectrum of **4e** (7.5–9.4 ppm, Solvent:  $\text{CDCl}_3$ )

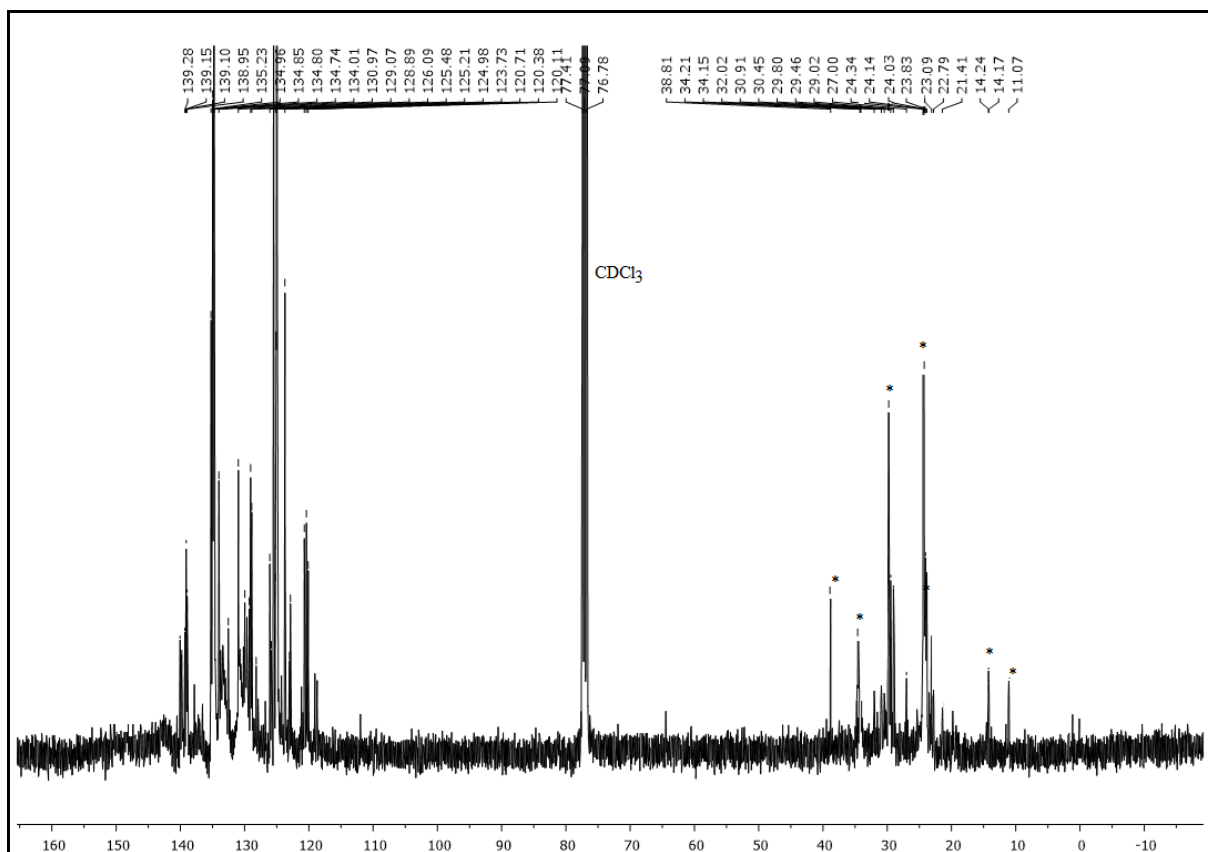

Figure S19.  $^{13}\text{C}$  NMR spectrum of **4e** (Solvent:  $\text{CDCl}_3$ ) \* Solvent impurities

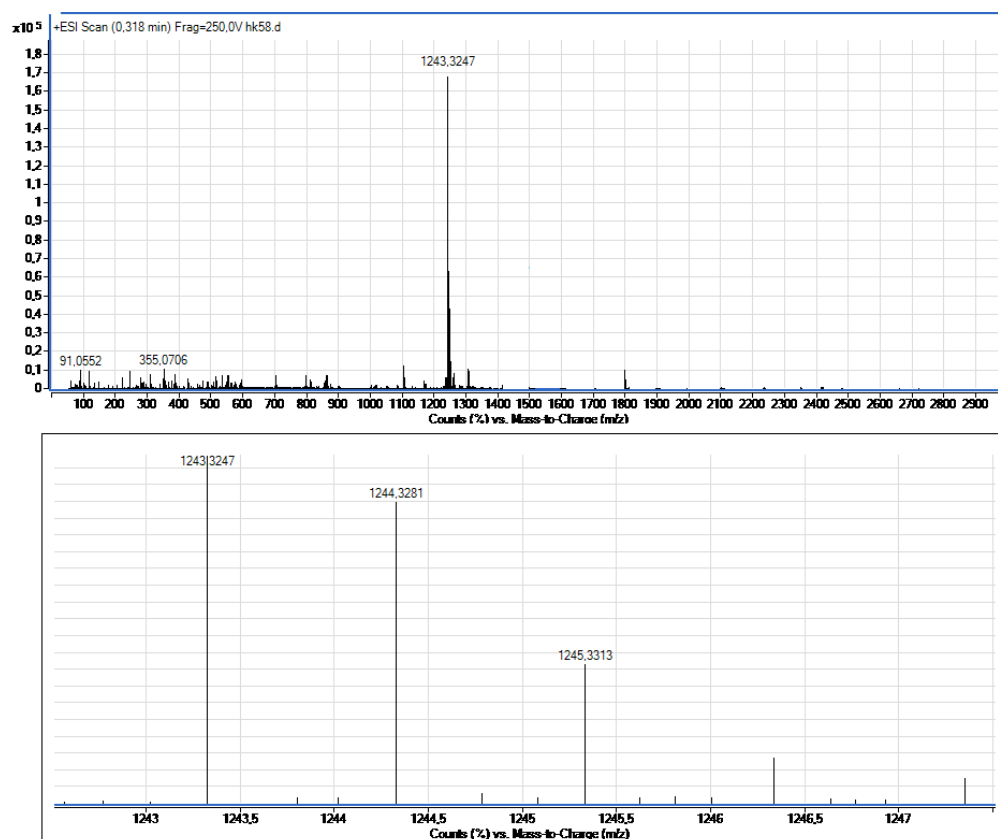

Figure S20. HRMS of **4e**.



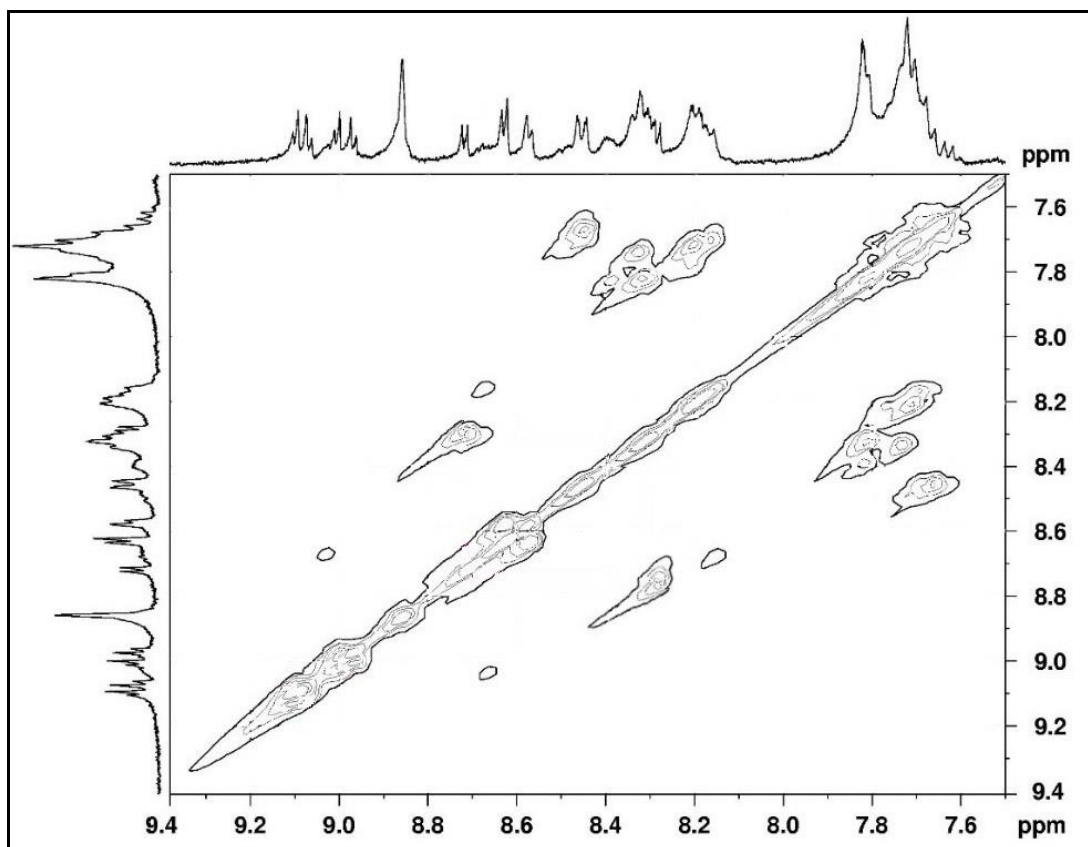

Figure S23.  $^1\text{H}$ - $^1\text{H}$  COSY NMR spectrum of **4f** (7.5–9.4 ppm, Solvent:  $\text{CDCl}_3$ )

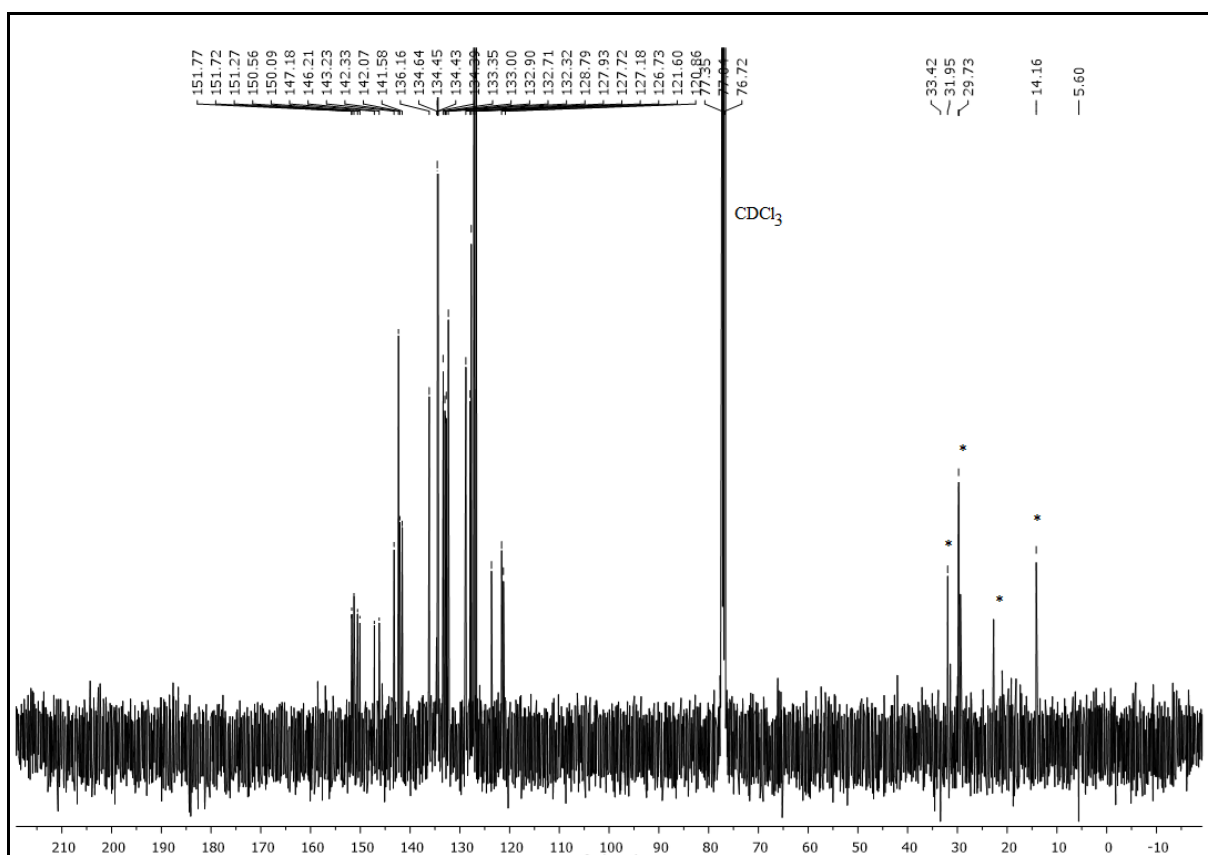

Figure S24.  $^{13}\text{C}$  NMR spectrum of **4f** (Solvent:  $\text{CDCl}_3$ ) \* Solvent impurities



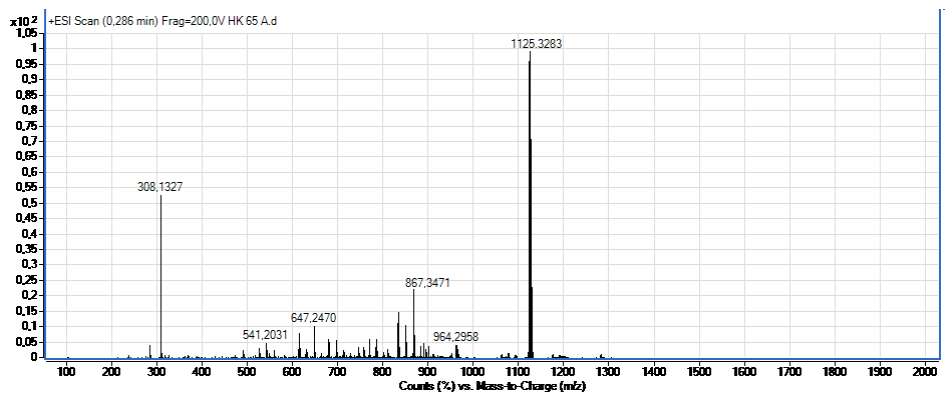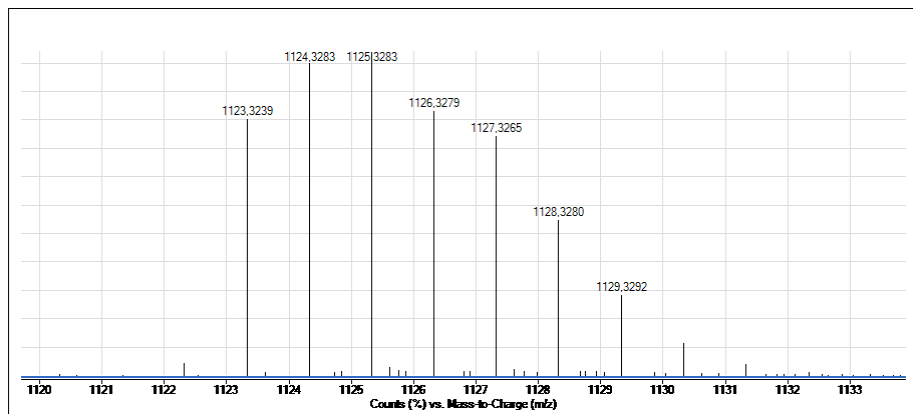

Figure S25. HRMS of 4f.

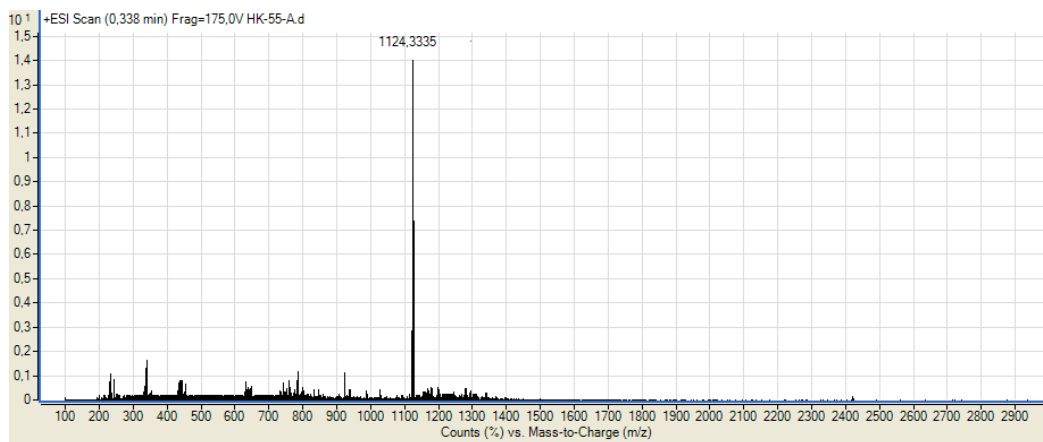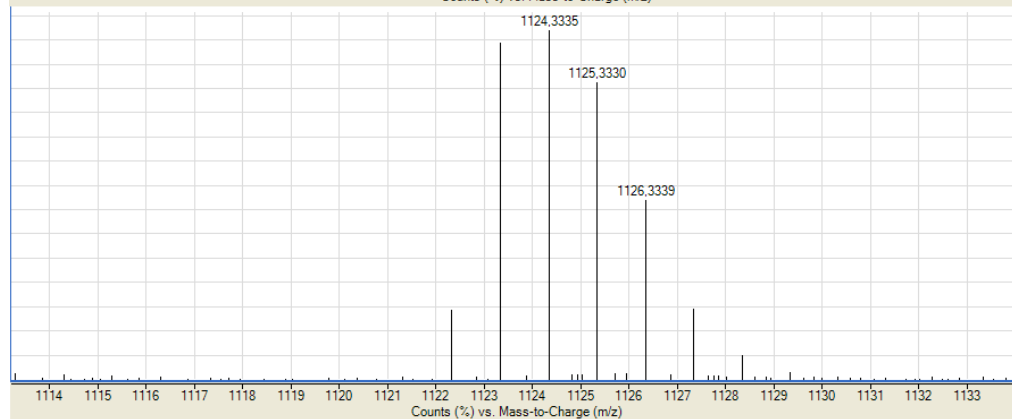

Figure S26. HRMS of 4g.

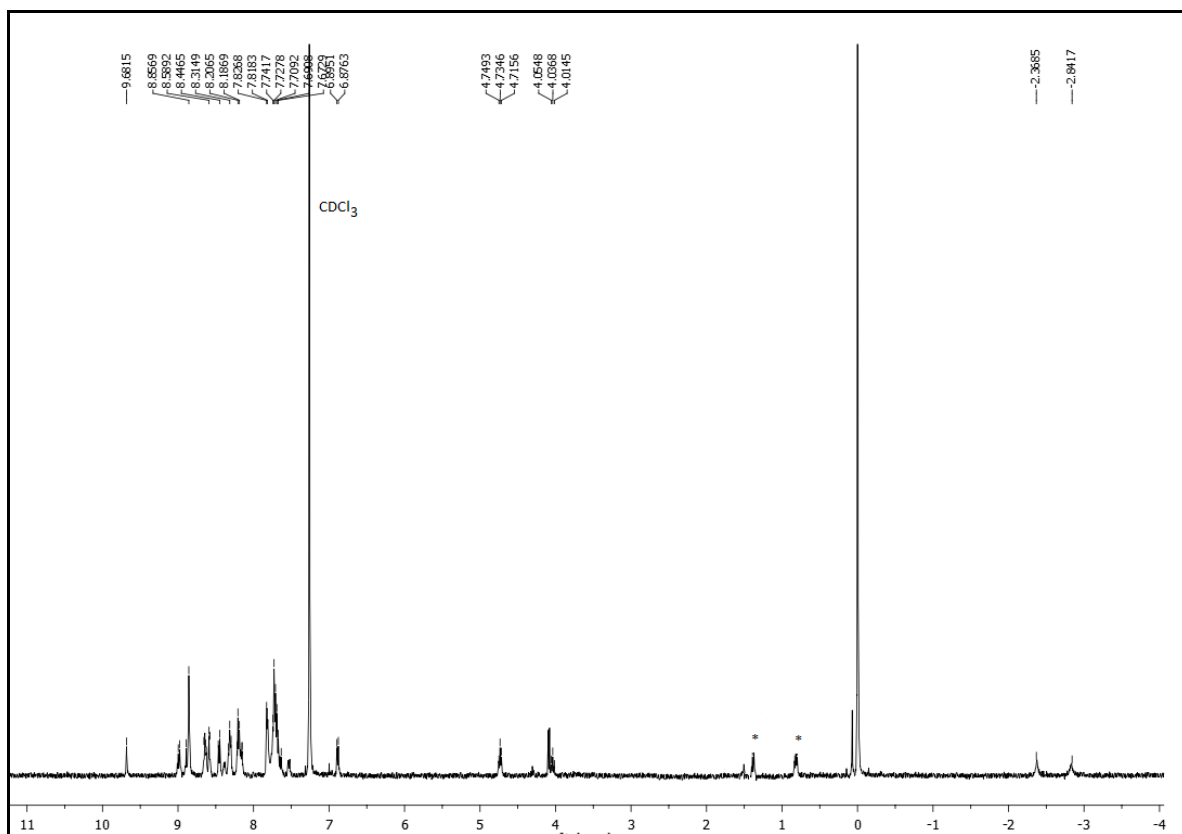

Figure S27. <sup>1</sup>H NMR spectrum of **5a** \* Solvent impurities

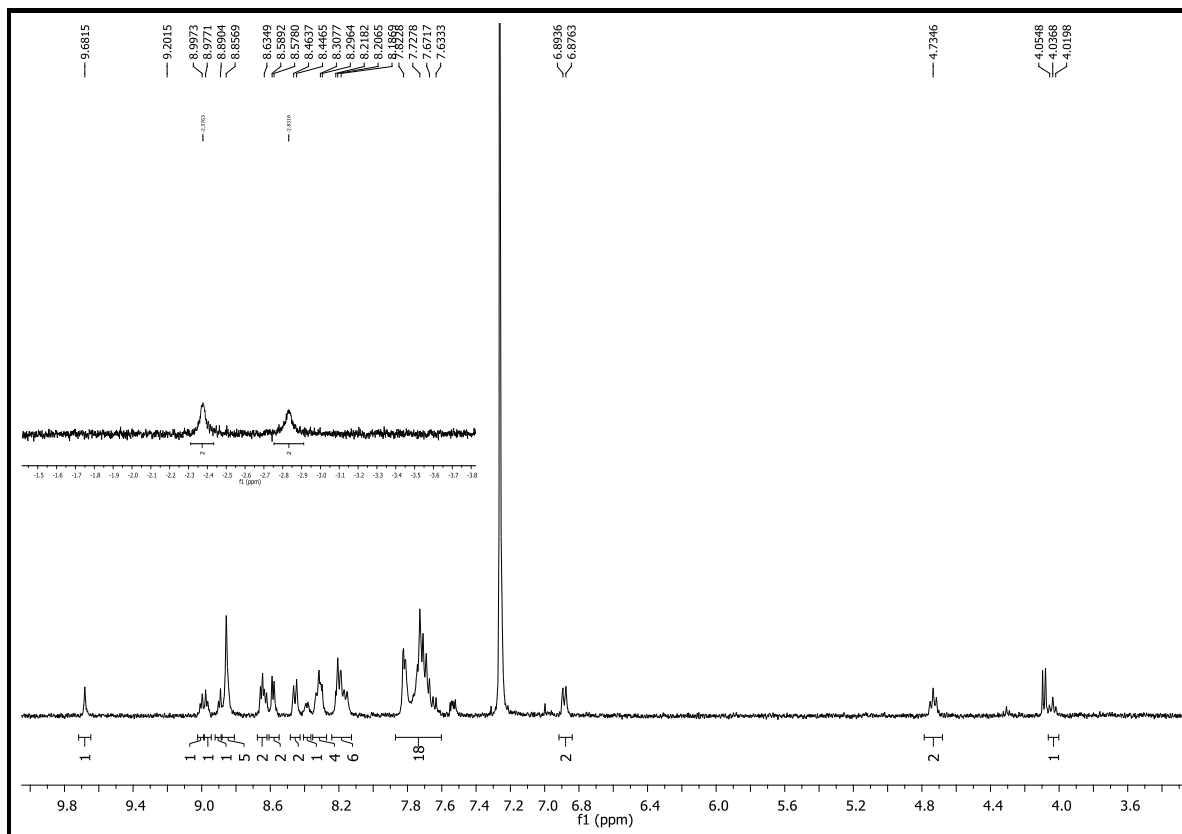

Figure S28. <sup>1</sup>H NMR spectrum of **5a** (Solvent: CDCl<sub>3</sub>)

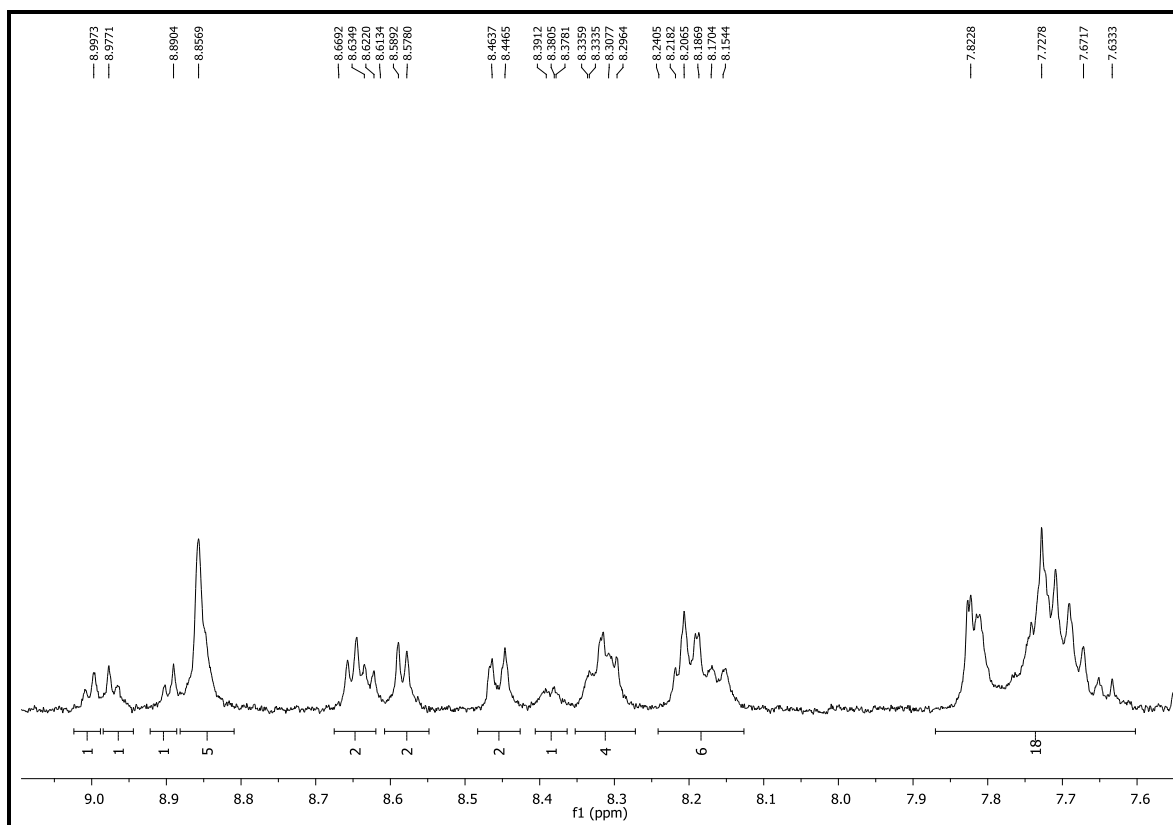

Figure S29.  $^1\text{H}$  NMR spectrum of **5a** (7.5–9.2 ppm, Solvent:  $\text{CDCl}_3$ )

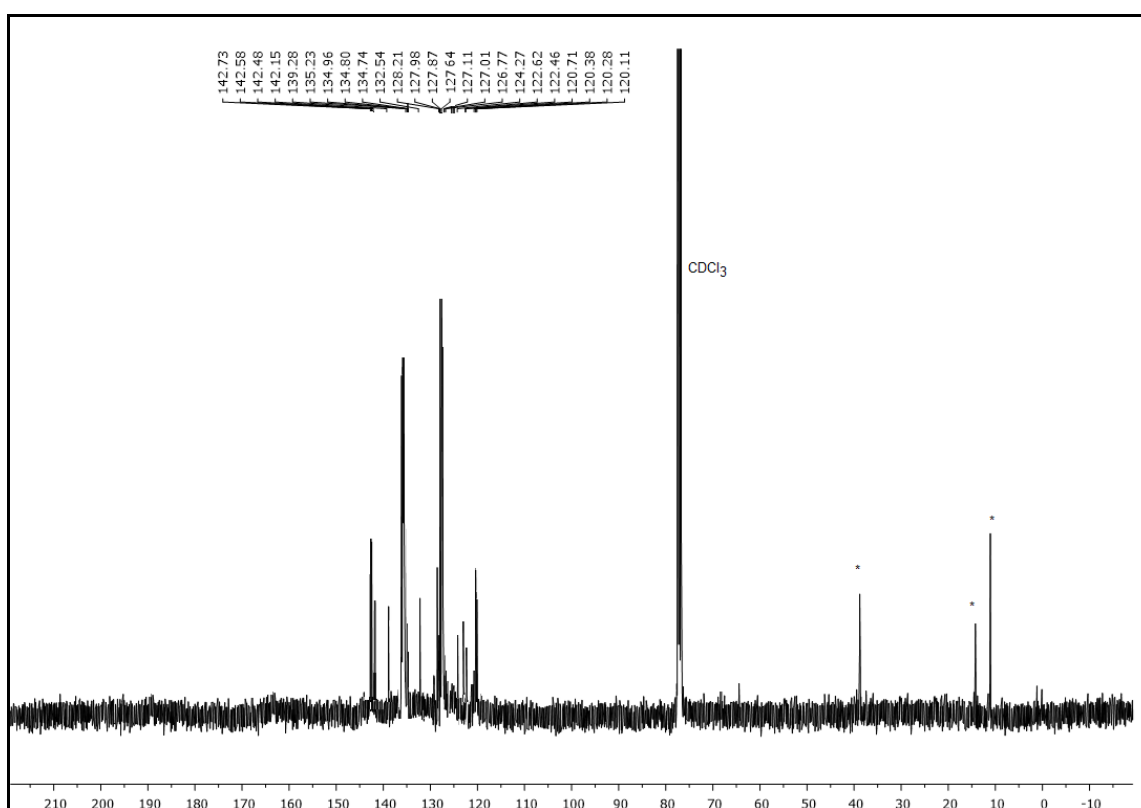

Figure S30.  $^{13}\text{C}$  NMR spectrum of **5a** (Solvent:  $\text{CDCl}_3$ ) \* Solvent impurities

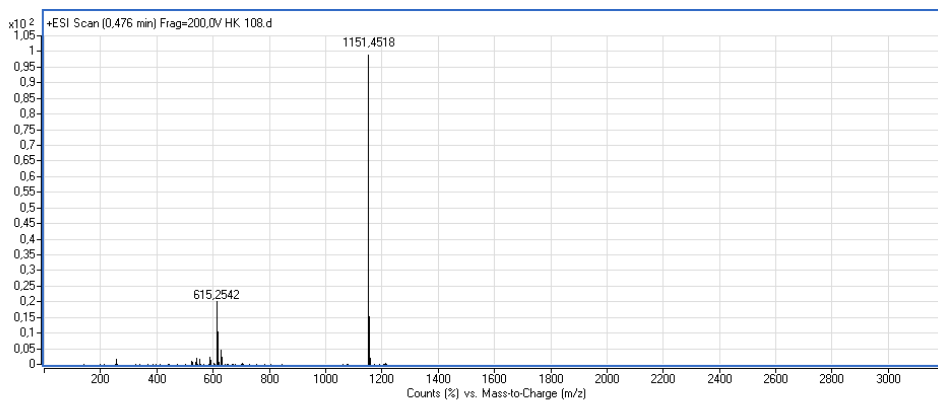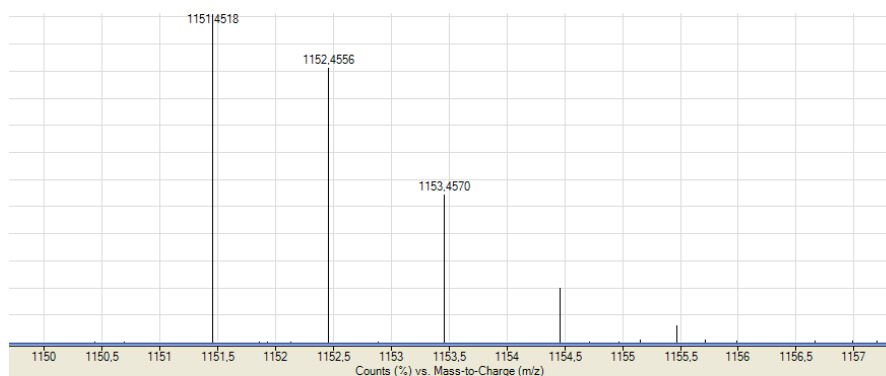

**Figure S31.** HRMS of 5a.

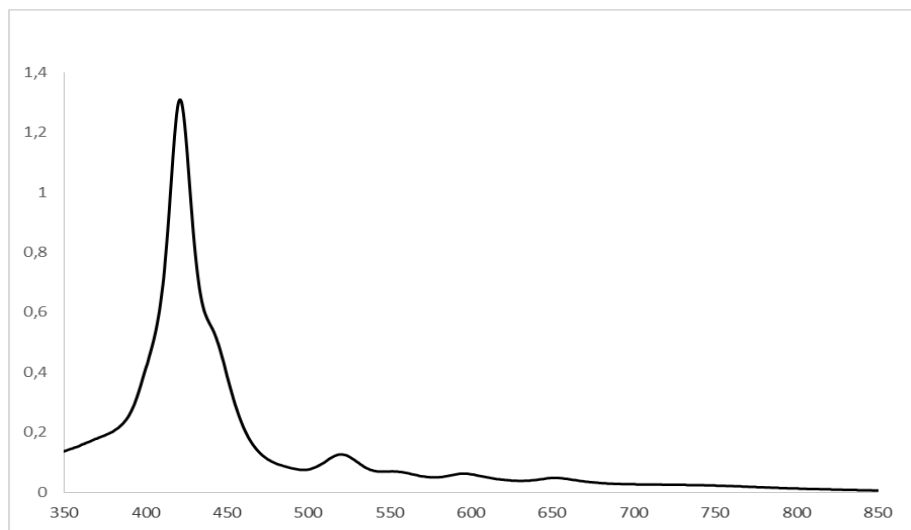

**Figure S32.** UV-vis absorption spectrum of 4a.

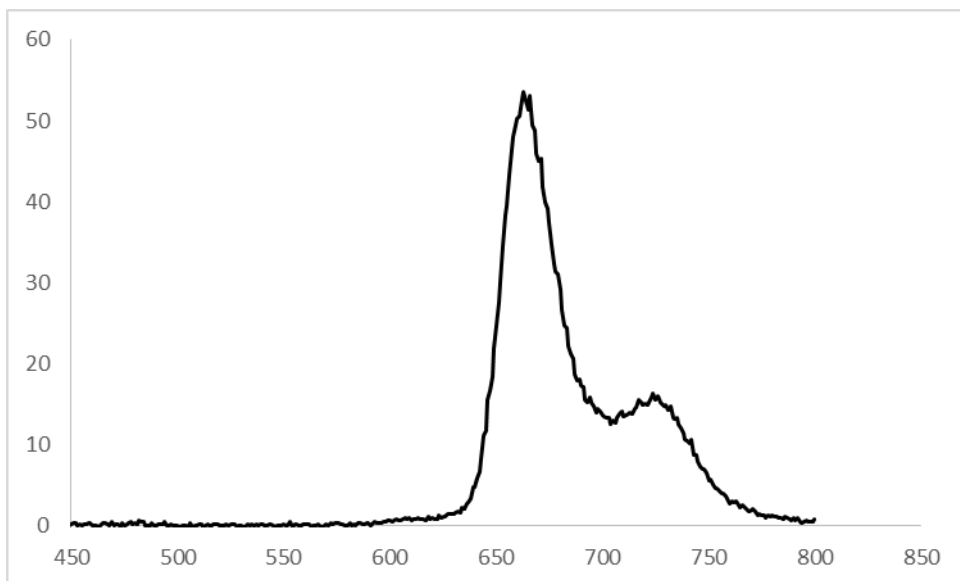

**Figure S33.** Emission spectrum of **4a** at room temperature (excitation at  $\lambda = 420$  nm)

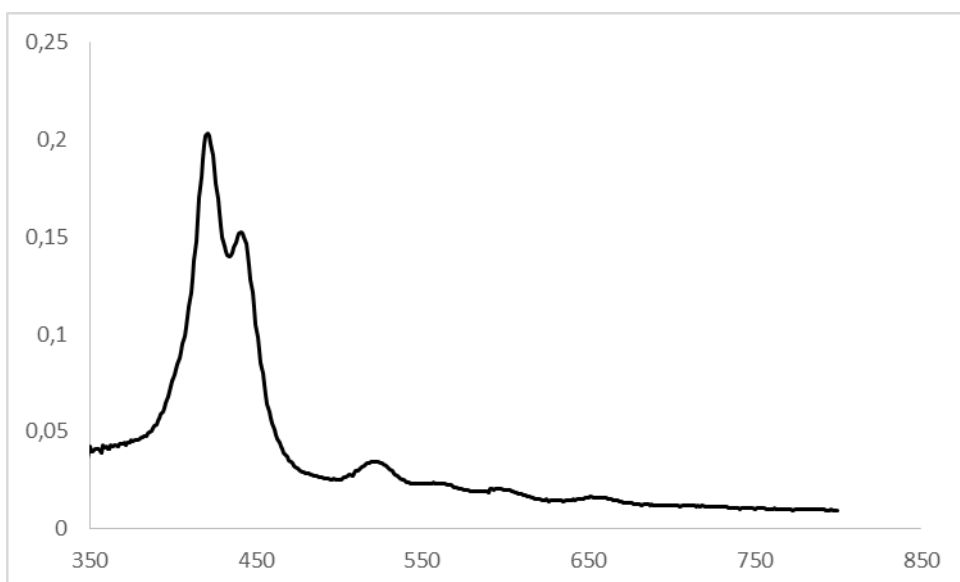

**Figure S34.** UV-vis absorption spectrum of **4b**.

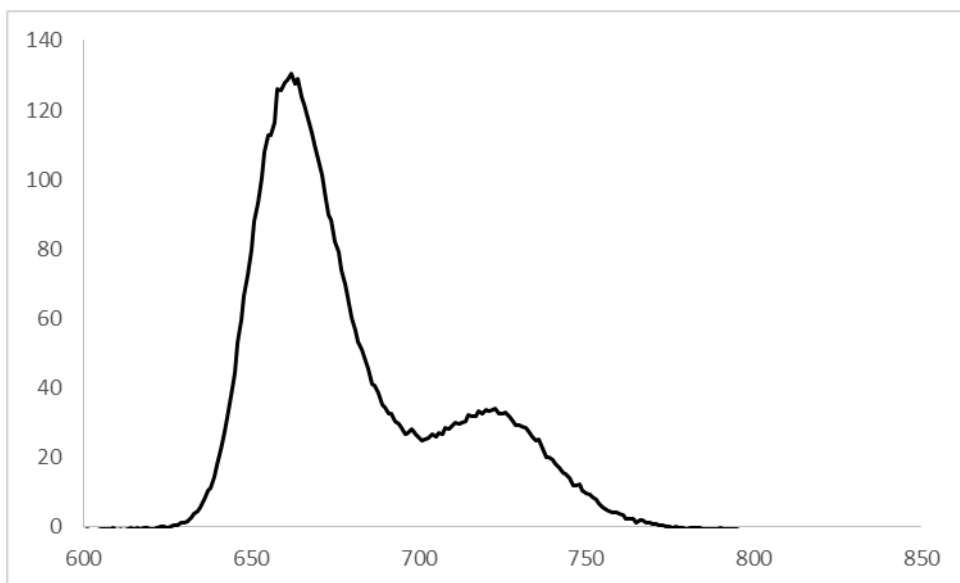

**Figure S35.** Emission spectrum of **4b** at room temperature (excitation at  $\lambda = 420$  nm)

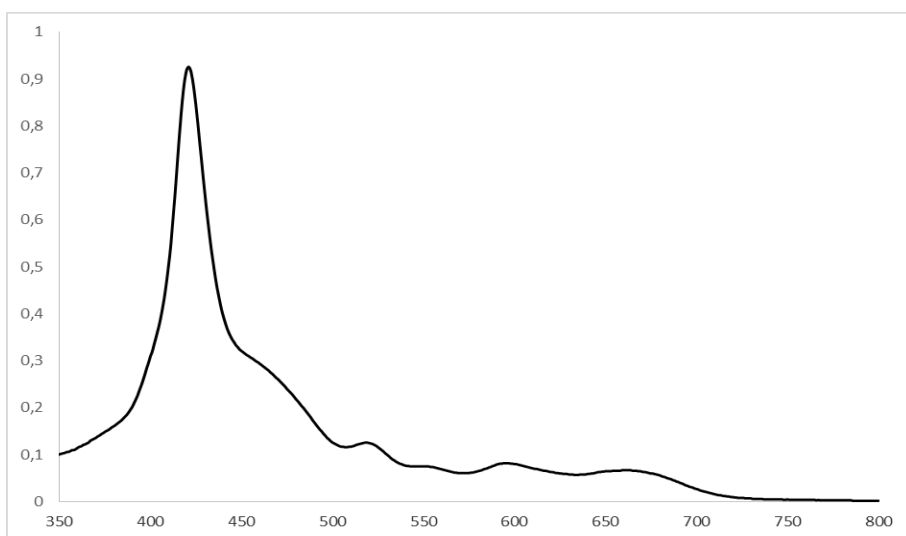

**Figure S36.** UV-vis absorption spectrum of **4c**.

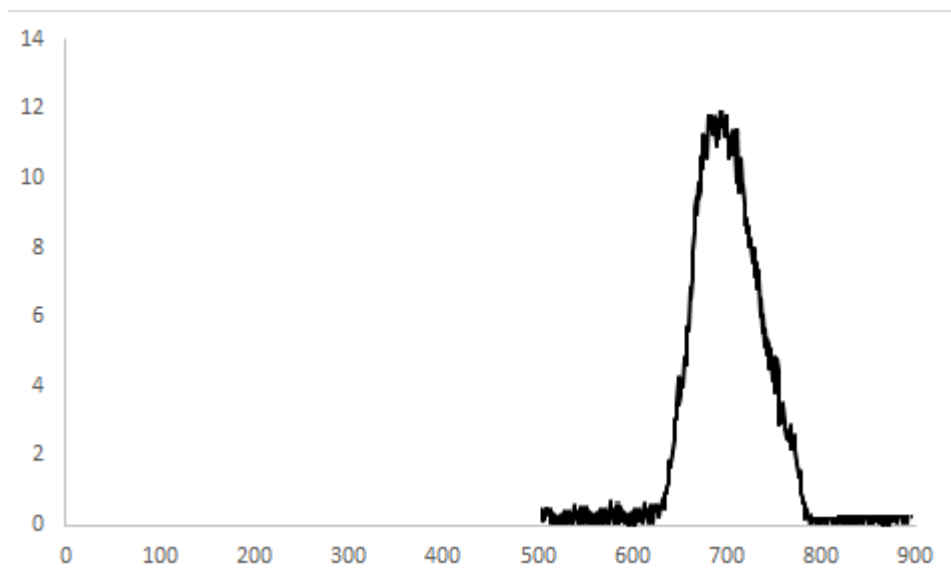

**Figure S37.** Emission spectrum of **4c** at room temperature (excitation at  $\lambda = 420$  nm)

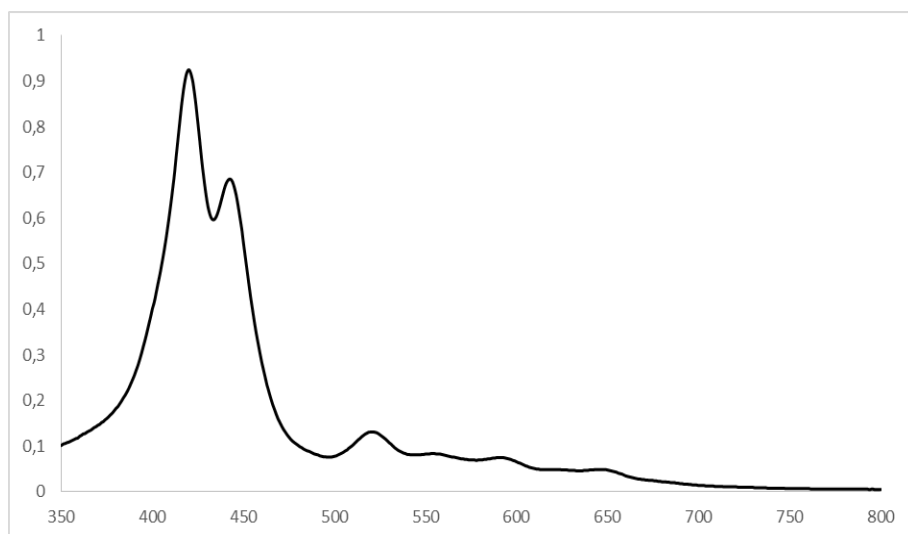

**Figure S38.** UV-vis absorption spectrum of **4e**.

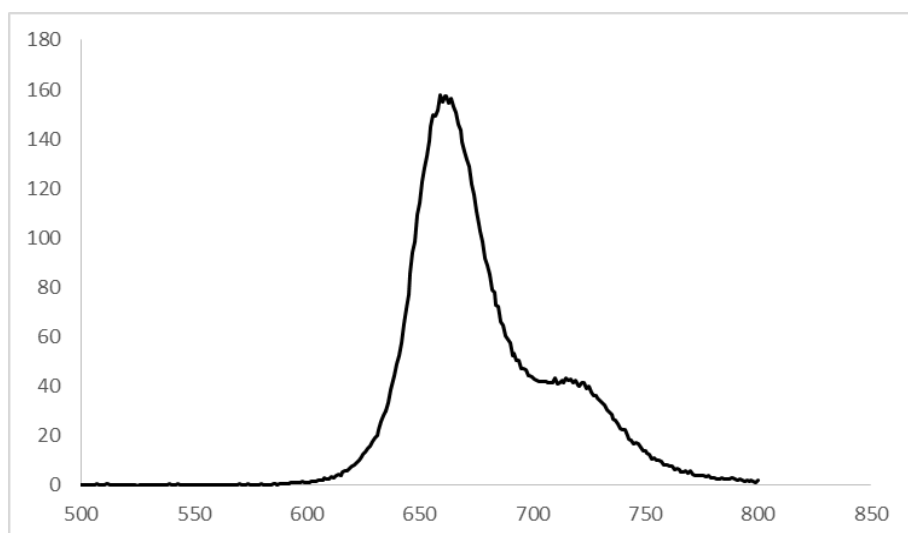

**Figure S39.** Emission spectrum of **4e** at room temperature (excitation at  $\lambda = 420$  nm)

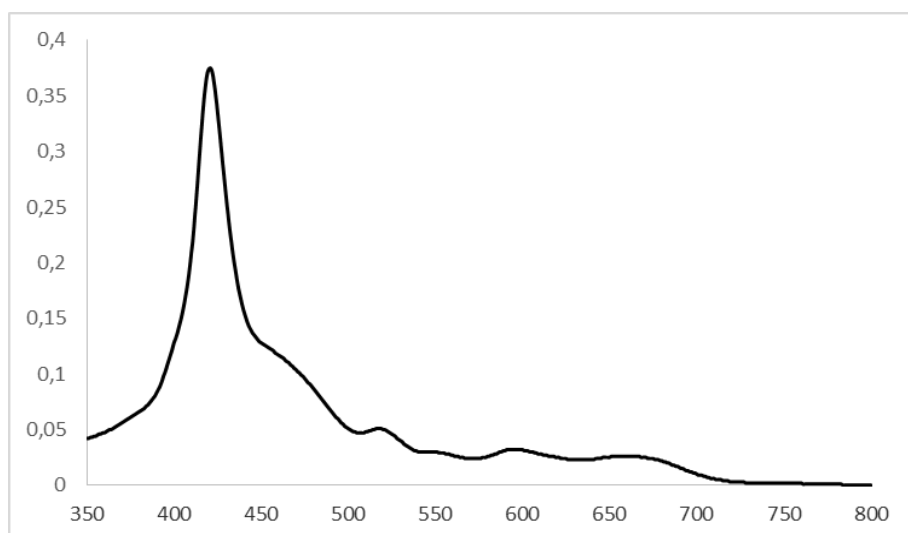

**Figure S40** UV-vis absorption spectrum of **4f**.



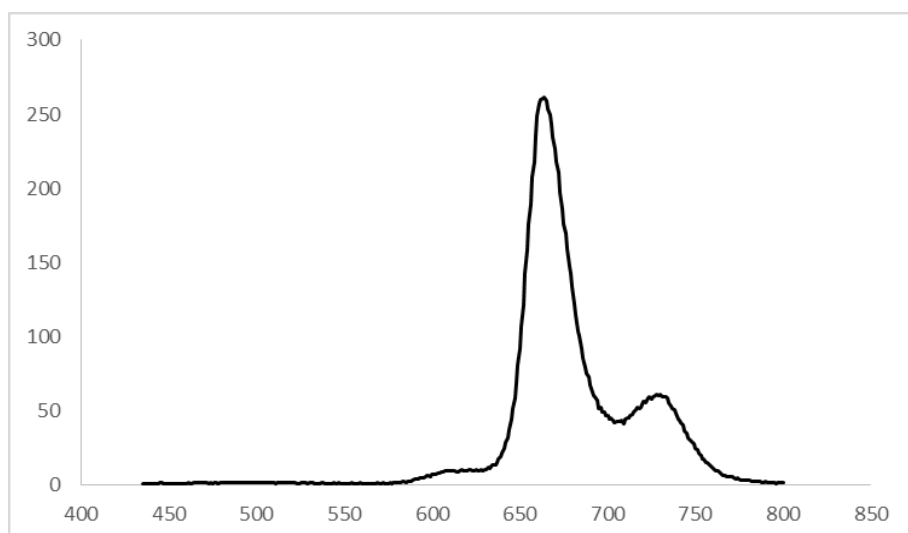

**Figure S41.** Emission spectrum of **4f** at room temperature (excitation at  $\lambda = 420$  nm)

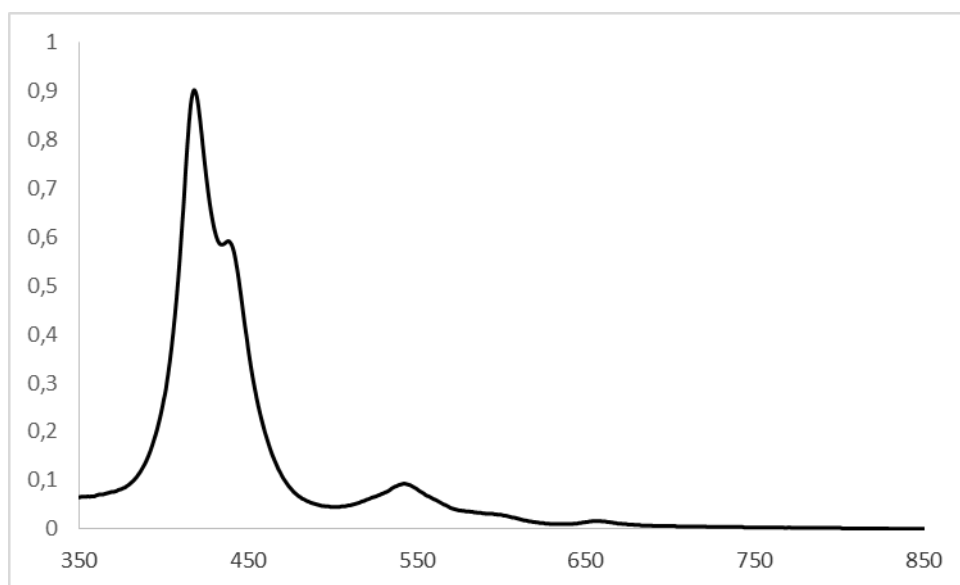

**Figure S42.** UV-vis absorption spectrum of **4g**.

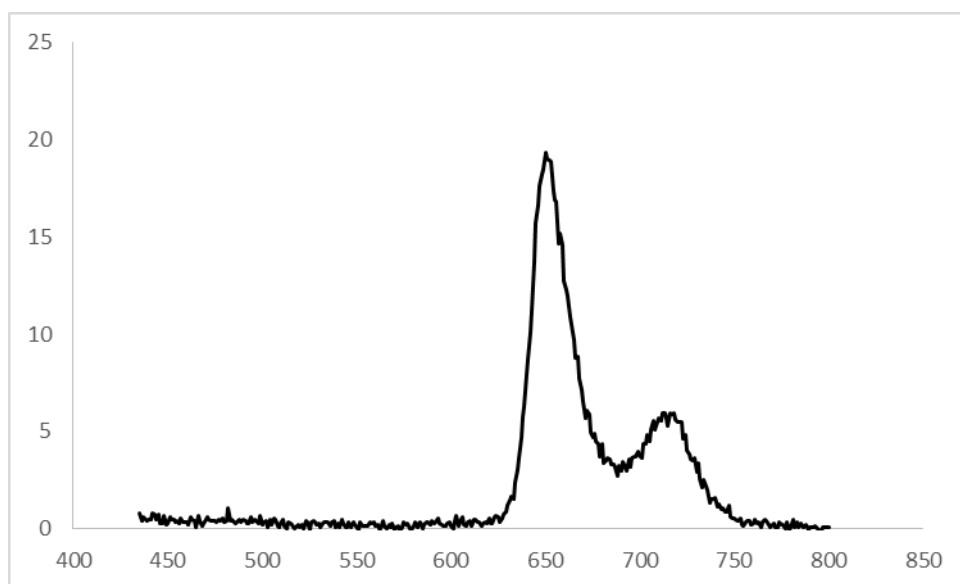

**Figure S43.** Emission spectrum of **4g** at room temperature (excitation at  $\lambda = 420$  nm)

## References

1. Zhang, W.; Xing, L.; Wang, H.; Liu, X.; Feng, Y.; Gao, C. *Langmuir* **2015**, *31*, 4330-4340.
2. Littler, B. J.; Miller, M. A.; Hung, C.-H.; Wagner, R. W.; O'Shea, D. F.; Boyle, P. D.; Lindsey, J. S. *J. Org. Chem.* **1999**, *64*, 1391-1396.
